# Supplementary material for: Adjacent single-atom irons boosting molecular oxygen activation on MnO2
Source: PubMed Central journal article supplement (PMC8440510; doi:10.1038/s41467-021-25726-w), 2021-09-14
Supplement: 41467_2021_25726_MOESM1_ESM.pdf [file 41467_2021_25726_MOESM1_ESM.pdf]

# Supplementary Information

## Adjacent single-atom irons boosting molecular oxygen activation on $\text{MnO}_2$

Huayu Gu, Xiao Liu\*, Xiufan Liu, Cancan Ling, Kai Wei, Guangming Zhan, Yanbing Guo and Lizhi Zhang\*

---

H. Gu, Prof. X. Liu, X. Liu, C. Ling, K. Wei, G. Zhan, Prof. Y. Guo, Prof. L. Zhang  
Key Laboratory of Pesticide & Chemical Biology of Ministry of Education, College of Chemistry,  
Central China Normal University, Wuhan 430079, P. R. China  
E-mail: liuxiao71@mail.ccnu.edu.cn; zhanglz@mail.ccnu.edu.cn

11 **Supplementary Figures**

12

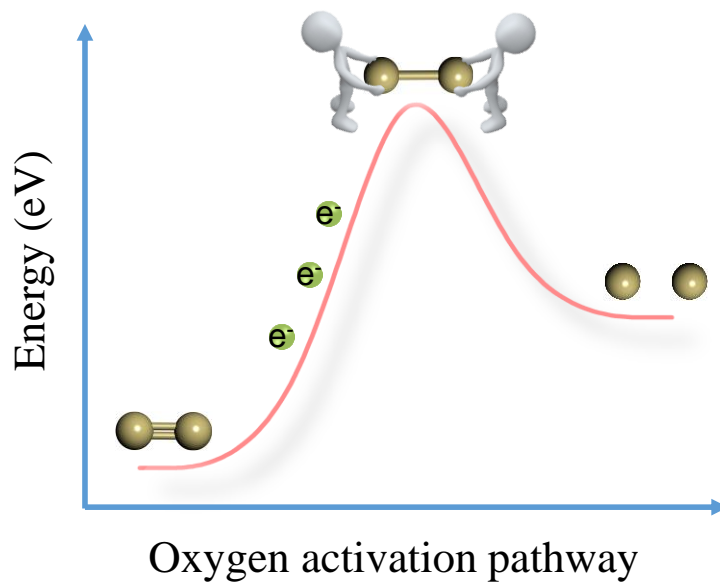

13

14

15 **Supplementary Figure 1.** Diagram of molecular oxygen activation.

16

17

18 Molecular oxygen activation is a continuous process of adsorption and dissociation of O<sub>2</sub> on the  
19 catalyst surface. The process relies on the transfer of electrons from the surface of catalyst to the O<sub>2</sub> to  
20 weaken the oxygen-oxygen double bond <sup>1,2</sup>. Meanwhile, the structure of the adsorption site on the  
21 catalyst surface plays an important role in the activation of O<sub>2</sub>.

22

23

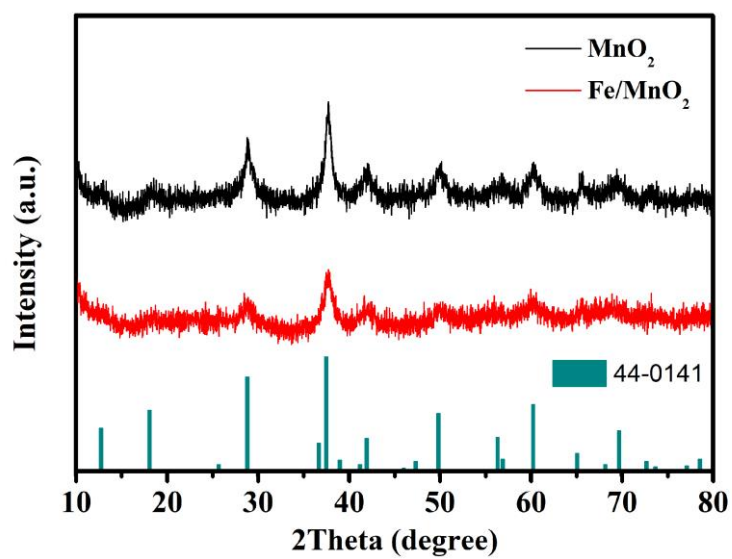

24

25 **Supplementary Figure 2.** XRD patterns of MnO<sub>2</sub> and Fe/MnO<sub>2</sub> (0.25% theoretical Fe content) as well  
26 as the standard card of MnO<sub>2</sub>.

27

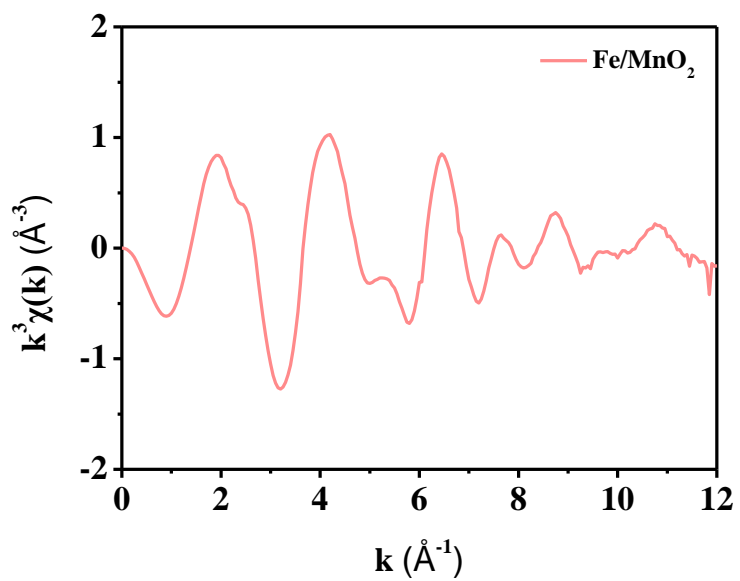

28

29 **Supplementary Figure 3.** k<sub>3</sub>-weighted EXAFS spectrum of Fe<sub>2</sub>O<sub>3</sub> sample.

30

31

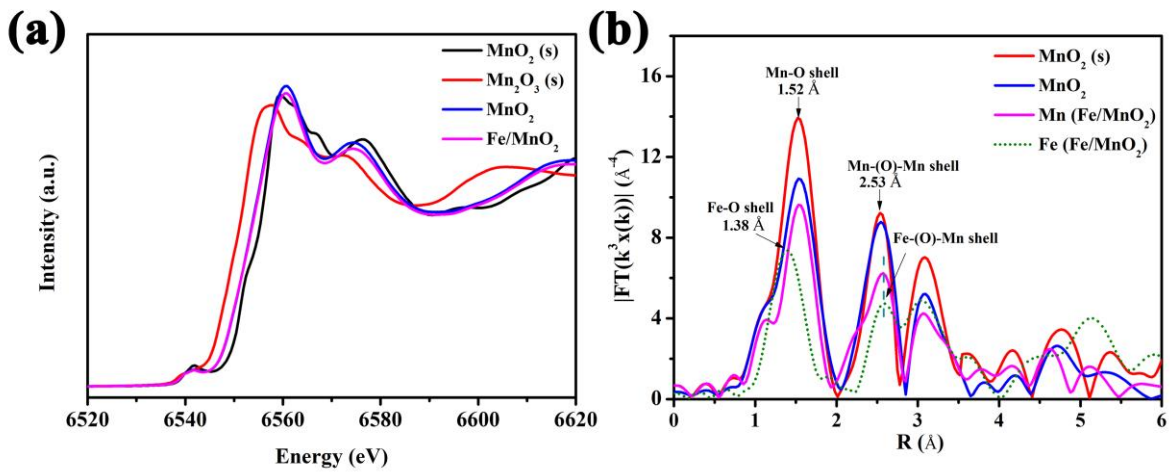

32

33 **Supplementary Figure 4.** The normalized XANES spectra (a) and Fourier-transformed K-edge

34 EXAFS spectra in R-space (b) of Mn (without phase correction). MnO<sub>2</sub> (s), Mn<sub>2</sub>O<sub>3</sub> (s) represent

35 standard reagents in spectra.

36

37

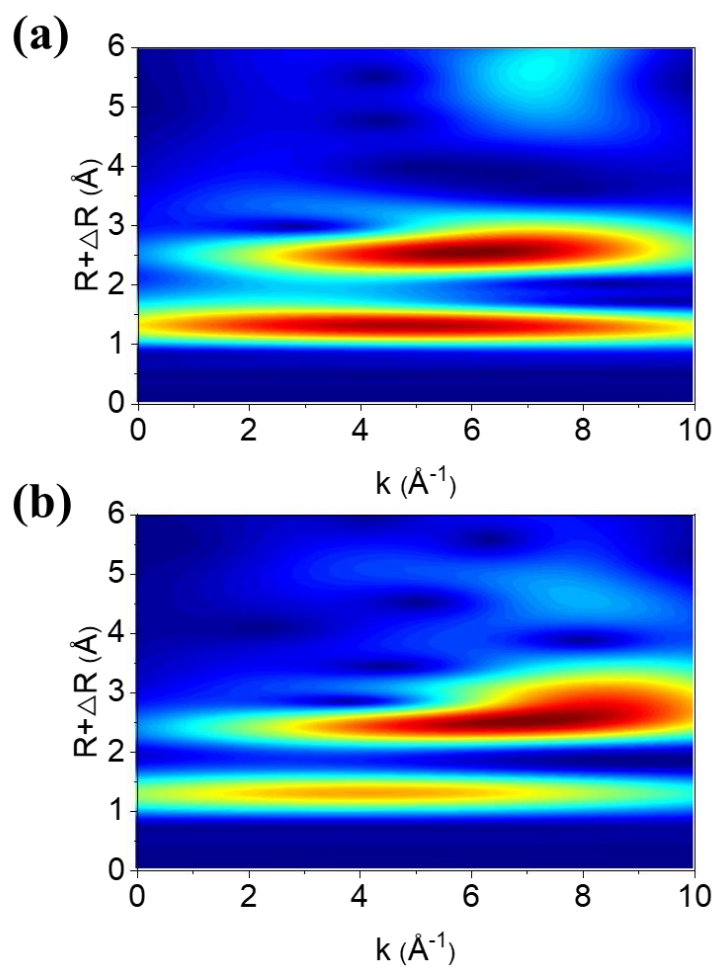

38

39 **Supplementary Figure 5.** Morlet wavelet transform for (a) Fe/MnO<sub>2</sub> and (b) Fe<sub>2</sub>O<sub>3</sub>.

40

41

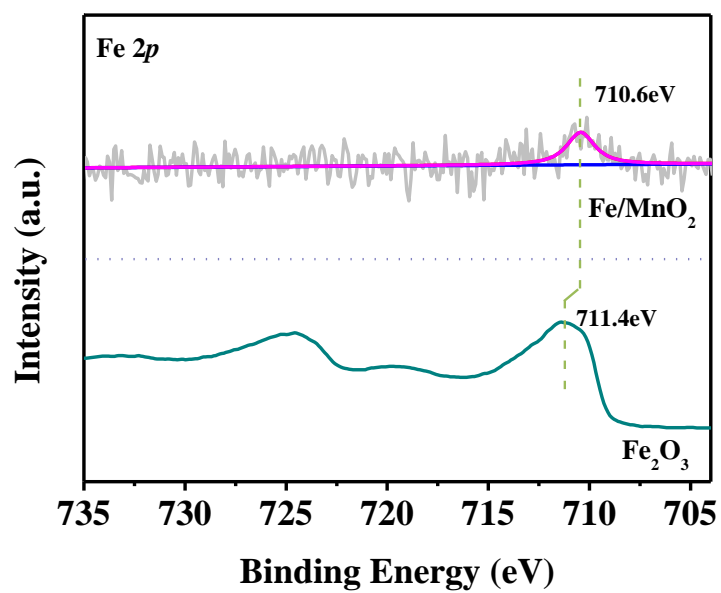

42

43 **Supplementary Figure 6.** XPS spectra of Fe 2p in Fe/MnO<sub>2</sub> and Fe<sub>2</sub>O<sub>3</sub> sample.

44

45

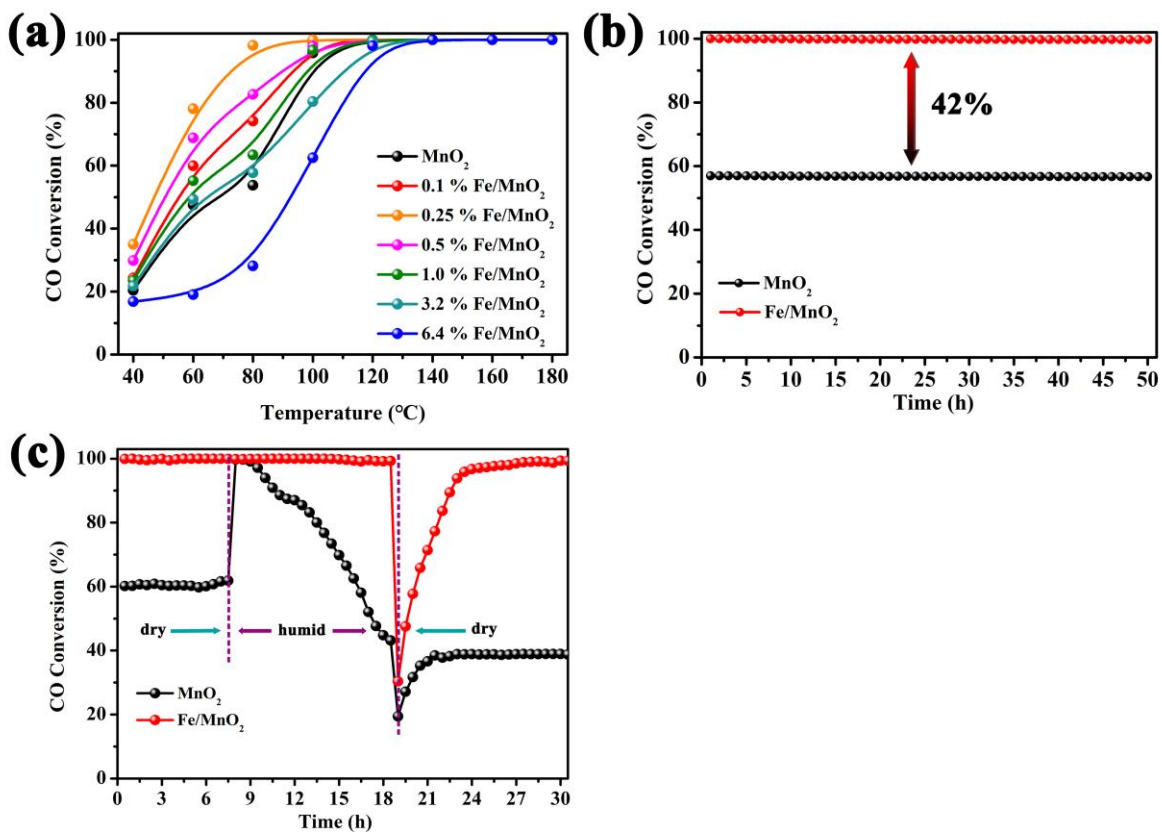

46

47 **Supplementary Figure 7.** (a) Light-off curves for CO oxidation of different proportions of Fe/MnO<sub>2</sub>  
 48 and MnO<sub>2</sub>. (b) The stability of catalysts in 50 h. (c) The tolerance test of water vapor for Fe/MnO<sub>2</sub> and  
 49 MnO<sub>2</sub>. (Reaction condition: 1% CO, 4% O<sub>2</sub>, and N<sub>2</sub> as balanced gas, total flow rate 50 mL min<sup>-1</sup> in a  
 50 and b. Besides that, 1% H<sub>2</sub>O is contained in the reaction system in c).

51

52



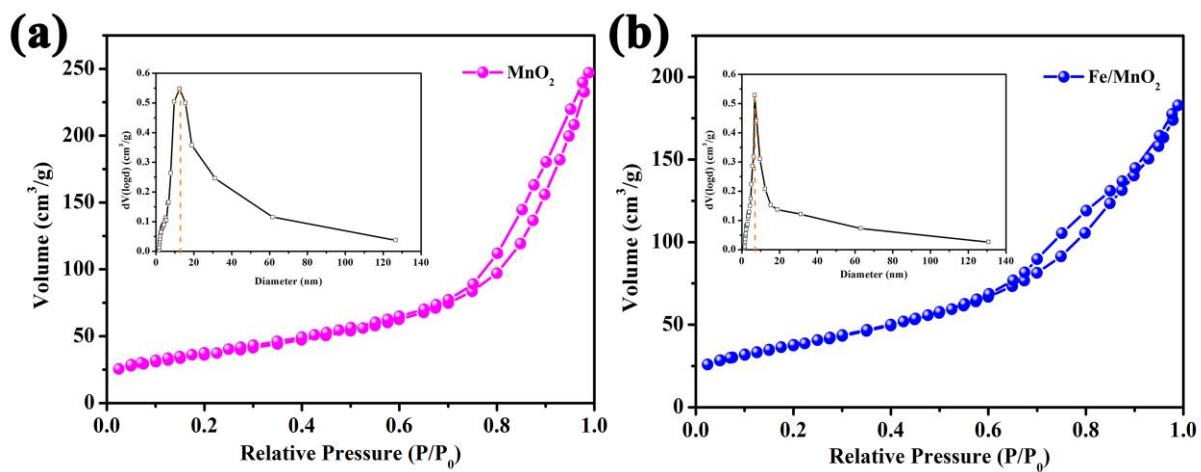

53

54 **Supplementary Figure 8.** Nitrogen adsorption/desorption isotherm plots of (a) MnO<sub>2</sub> and (b) Fe/MnO<sub>2</sub>

55 (the insets of a and b showed the pore size distribution).

56

57

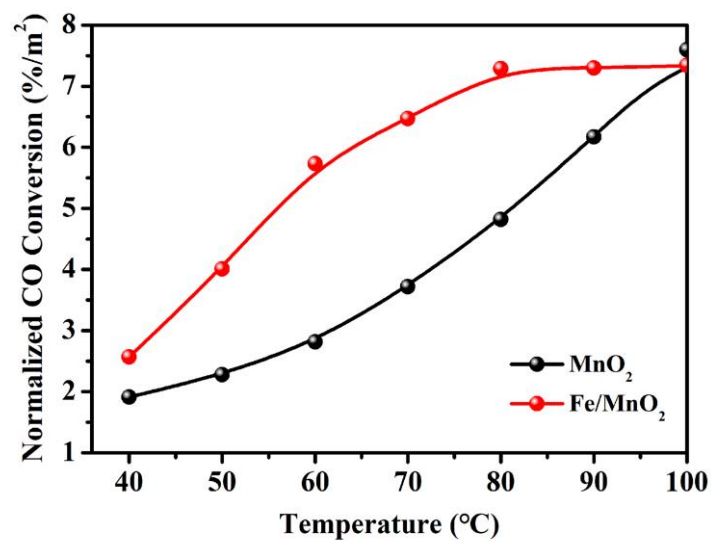

58

59 **Supplementary Figure 9.** CO catalytic performance of the MnO<sub>2</sub> and Fe/MnO<sub>2</sub> normalized by BET

60 surface area recorded in Table S5.

61

62

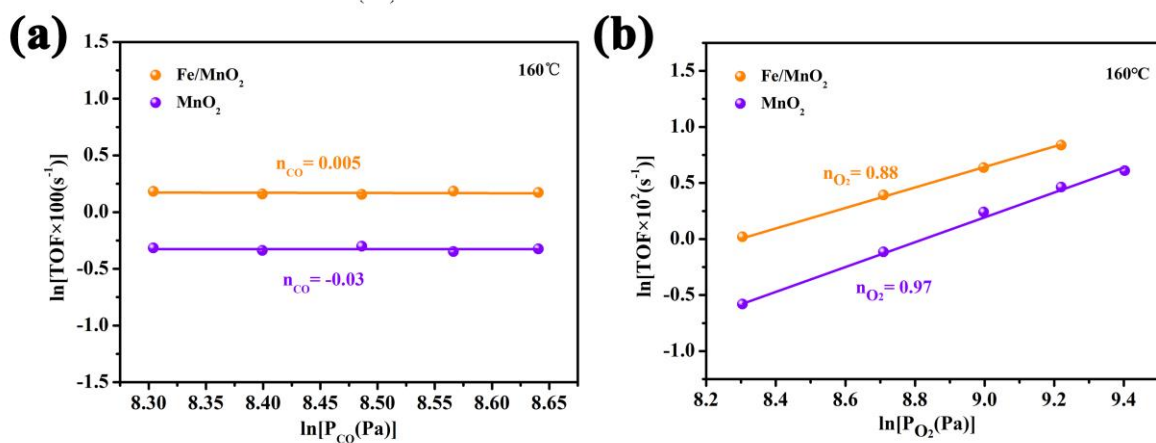

63

64 **Supplementary Figure 10.** Effect of (a) CO and (b) O<sub>2</sub> partial pressure on the TOF on supported  
 65 Fe/MnO<sub>2</sub> and MnO<sub>2</sub> at 160 °C. P<sub>O<sub>2</sub></sub> = 4 kPa in a and P<sub>CO</sub> = 4 kPa in b.

66

67 At low temperatures, Fe/MnO<sub>2</sub> was easier to activate molecular oxygen than MnO<sub>2</sub>, which should  
 68 be the essence for the better catalytic activity of Fe/MnO<sub>2</sub>. Relatively, the reaction orders of O<sub>2</sub>  
 69 increased at the higher temperature of 160 °C, and the gap between Fe/MnO<sub>2</sub> and MnO<sub>2</sub> reduced  
 70 significantly. More surface-active sites were involved in the reaction, masking the promoting effect of  
 71 Fe.

72

73

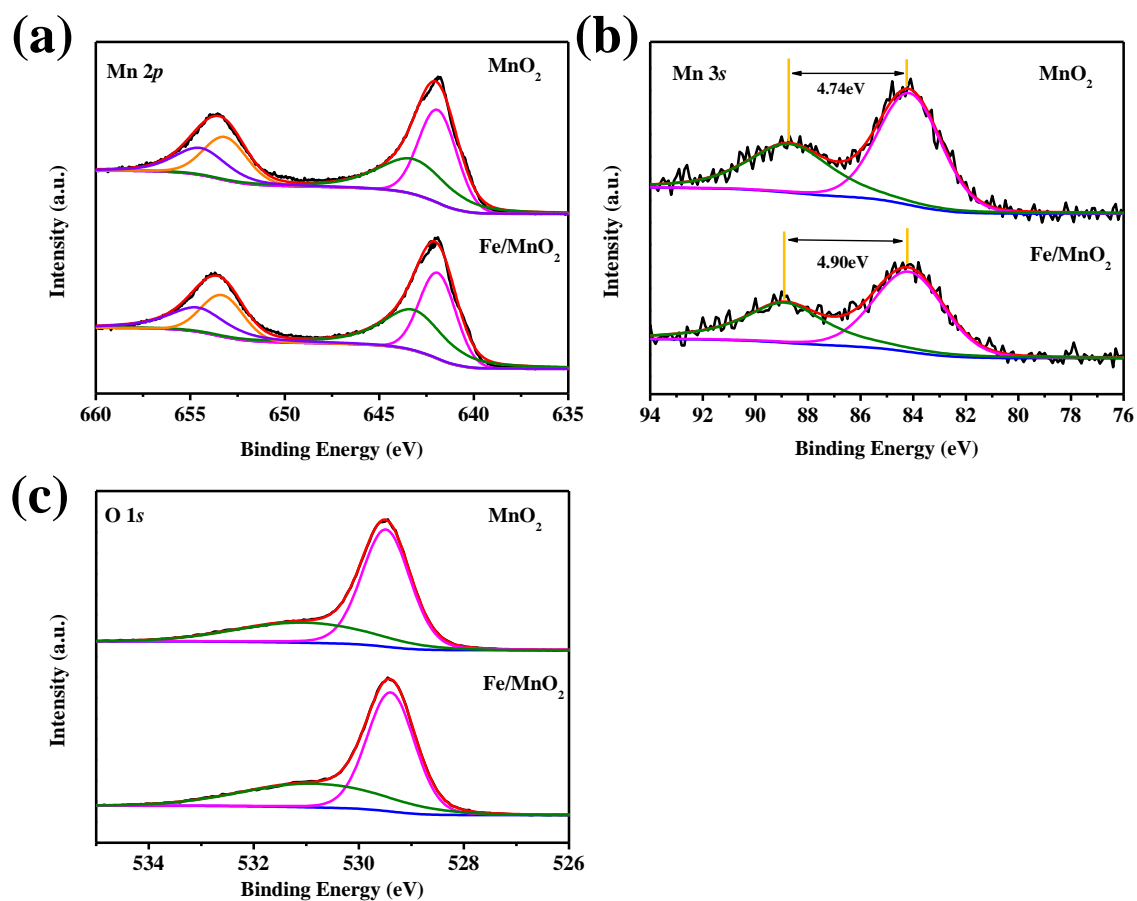

74

75 **Supplementary Figure 11.** (a) Mn 2*p*, (b) Mn 3*s*, and (c) O 1*s* XPS spectra of Fe/MnO<sub>2</sub> and MnO<sub>2</sub>.

76

77 The XPS spectra of O 1*s* shown in Figure S11c was deconvoluted into two peaks at 531 and 529  
 78 eV, which were attributed to adsorbed oxygen species (including surface hydroxyl and surface adsorbed  
 79 O<sub>2</sub>) and lattice oxygen species, respectively<sup>3</sup>. Fe/MnO<sub>2</sub> owned a higher concentration of adsorbed  
 80 oxygen species (37%) than MnO<sub>2</sub> (31%), indicating that it possessed a greater number of active sites,  
 81 which will immensely promote the catalytic reaction of CO.

82

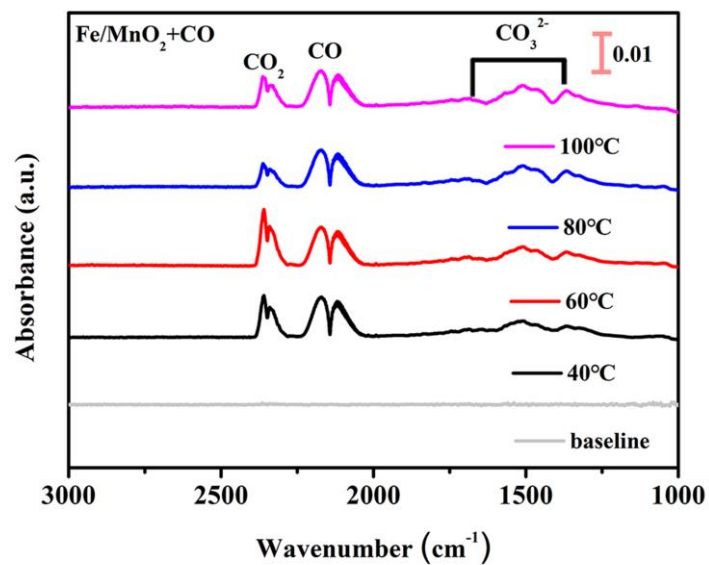

83

84 **Supplementary Figure 12.** In situ DRIFTS over Fe/MnO<sub>2</sub> in a continuous flow of 1% CO/4% O<sub>2</sub>/N<sub>2</sub> in  
85 different temperature.

86

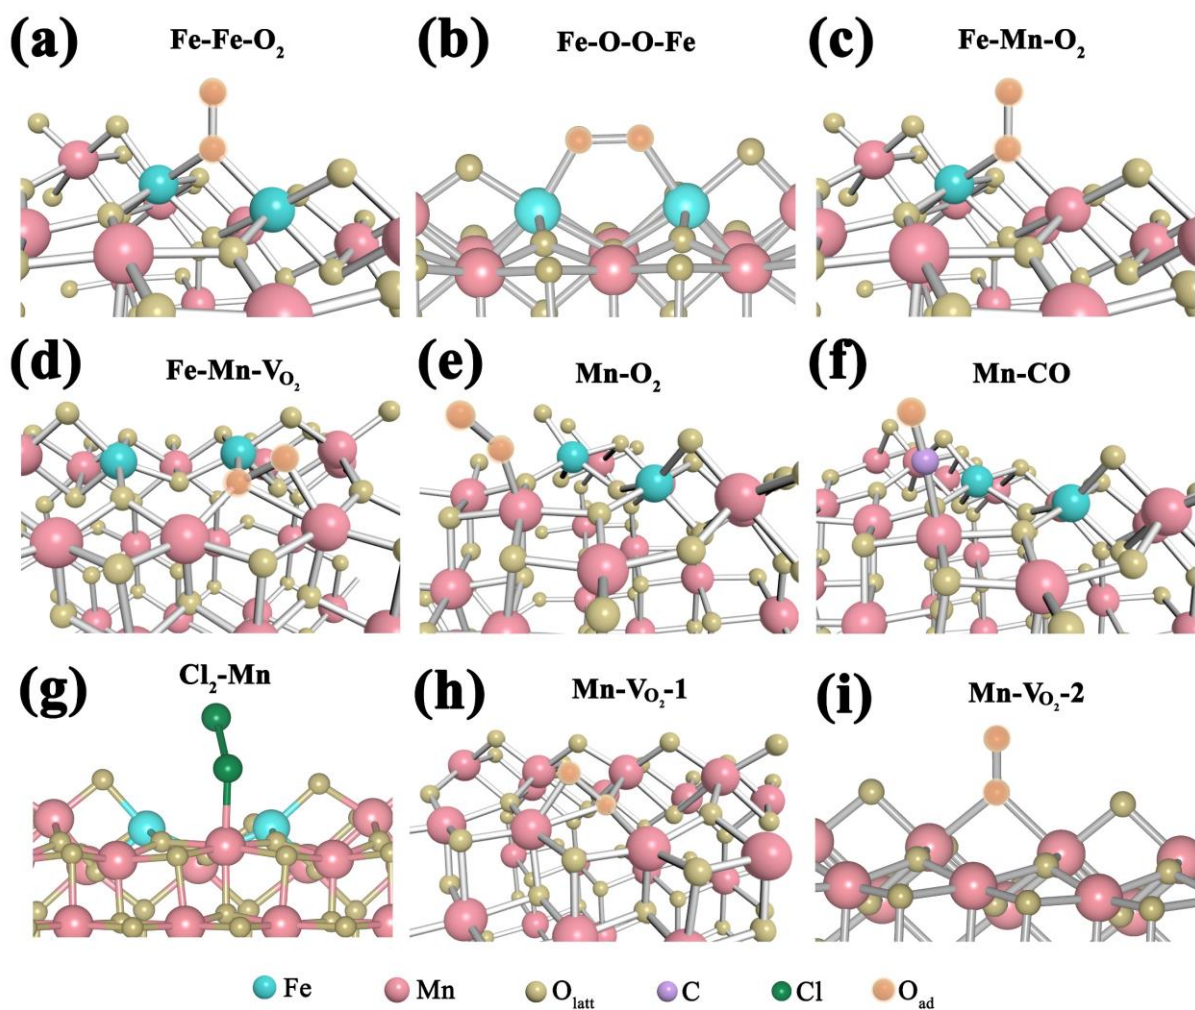

| Configuration          | a     | b     | c     | d     | e     | f     | g     | h     | i     |
|------------------------|-------|-------|-------|-------|-------|-------|-------|-------|-------|
| Adsorption Energy (eV) | -2.00 | -1.47 | -1.82 | -0.83 | -1.66 | -2.15 | -3.11 | -2.39 | -1.69 |

87

88 **Supplementary Figure 13.** The stable configurations of (a-e) O<sub>2</sub>, (f) CO and (g) Cl<sub>2</sub> adsorbed at the  
 89 different sites of Fe/MnO<sub>2</sub> surface, and O<sub>2</sub> adsorbed in (h) the oxygen vacancy or (i) bi-manganese sites  
 90 of MnO<sub>2</sub>. The corresponding adsorption energy with zero-point energy correction is listed in the table of  
 91 the picture.

92

93 Compared with O<sub>2</sub> linked to Mn site (-1.66 eV), CO will achieve preferential adsorption (-2.15 eV)  
 94 under the reaction atmosphere conditions (Supplementary Fig. 13e, f). This will be further used in the  
 95 later calculation of proposed reaction mechanism.

96

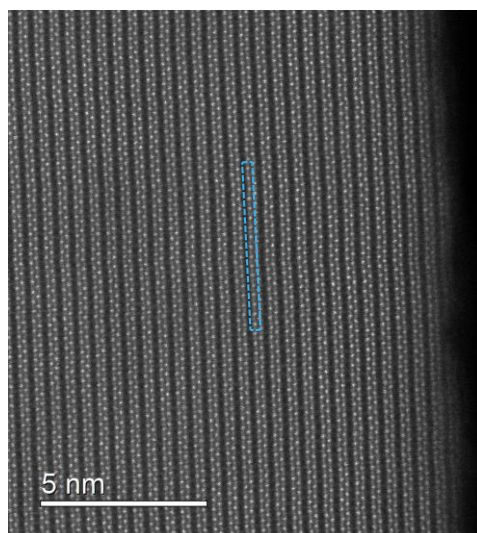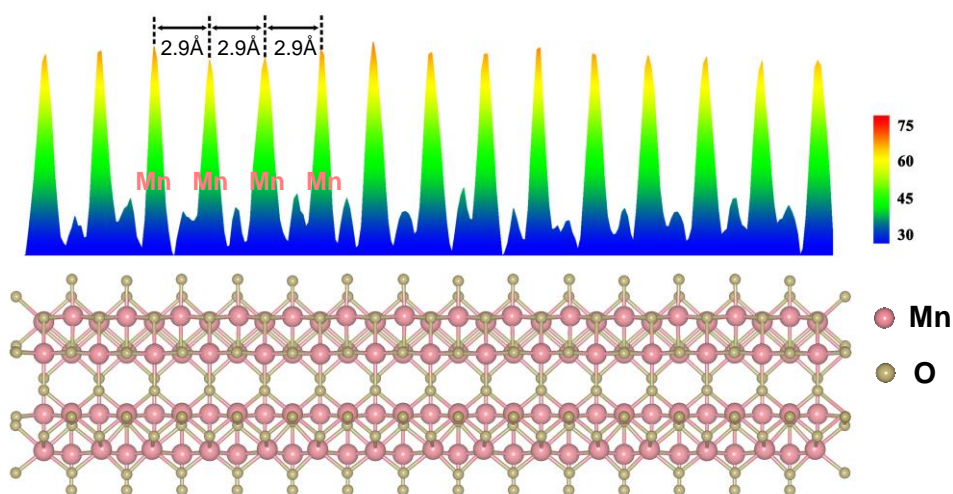

97  
98

99 **Supplementary Figure 14.** STEM image of MnO<sub>2</sub> (top), intensity surface plot from blue dashed  
100 rectangle (middle) and the corresponding structural model (bottom).

101

102



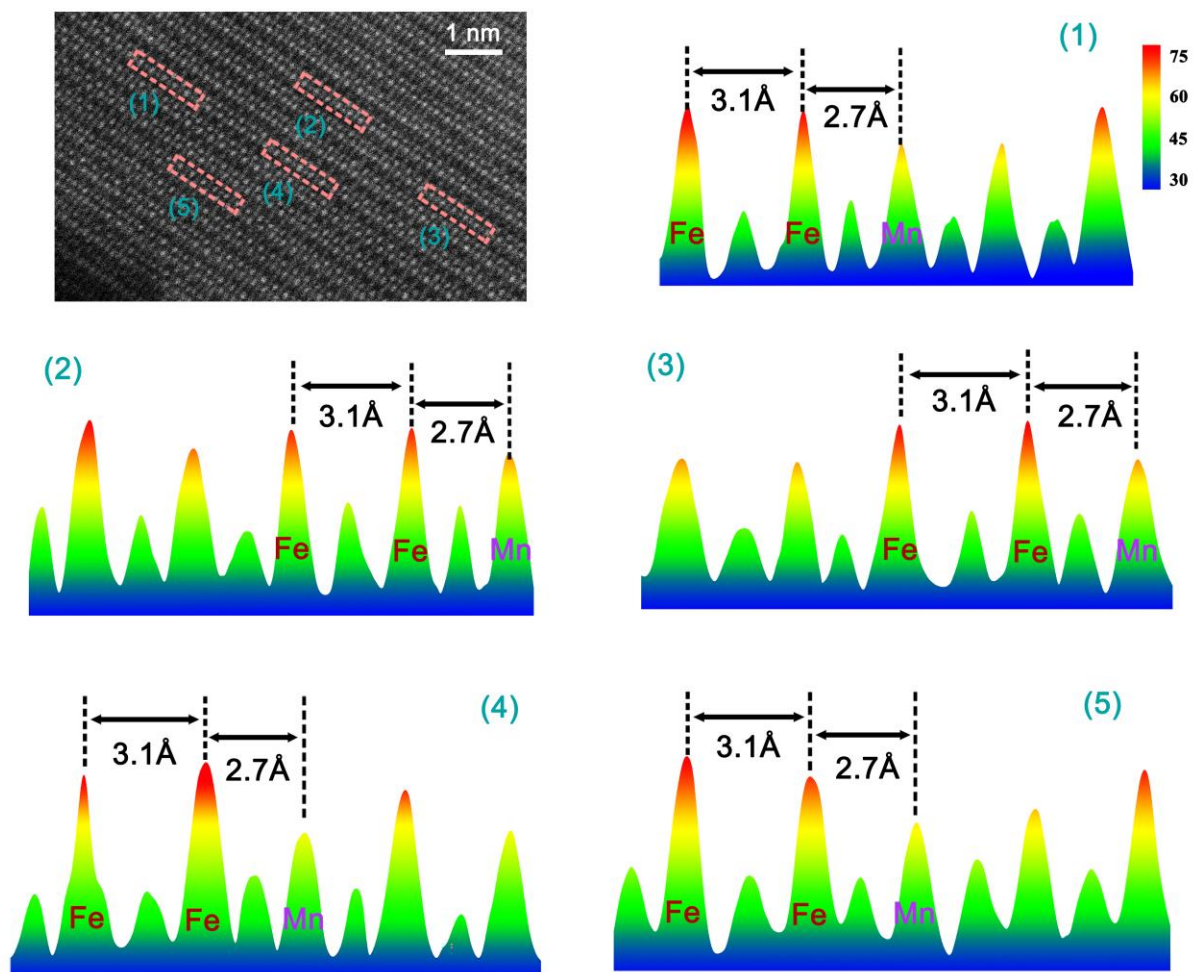

103

104 **Supplementary Figure 15.** Intensity surface plots in different position from STEM image of Fe/MnO<sub>2</sub>.

105



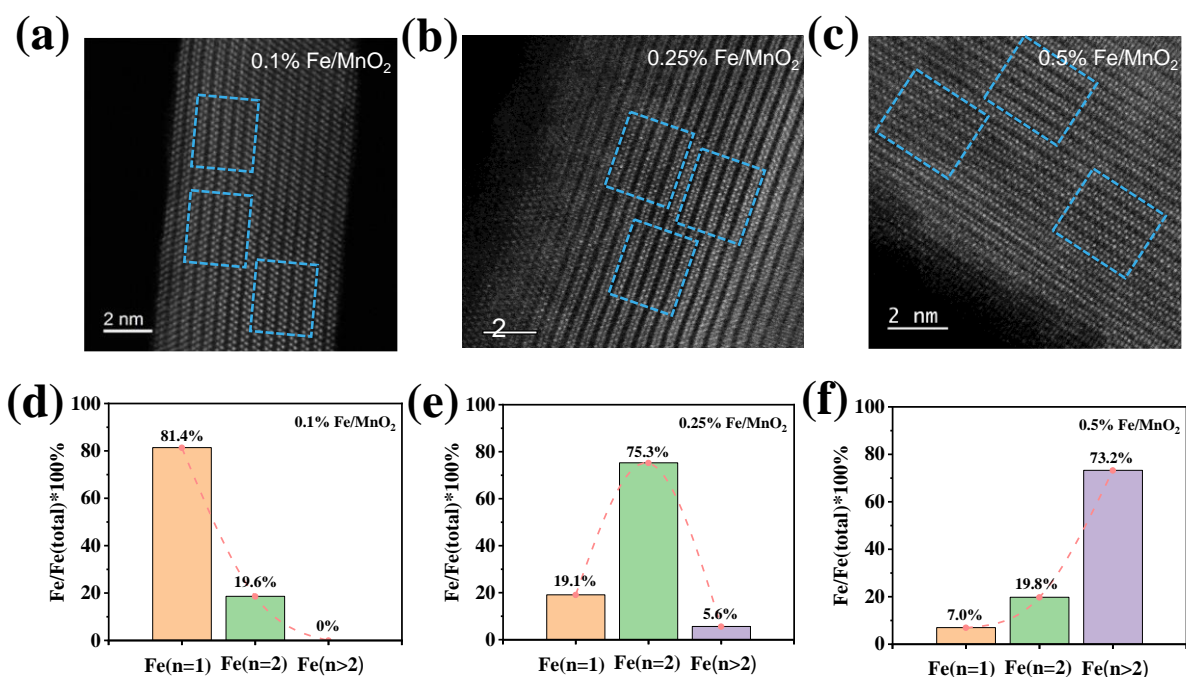

106

107 **Supplementary Figure 16.** (a-c) STEM images of different Fe/MnO<sub>2</sub> catalysts. The atoms surrounded  
 108 by the blue dotted box will be used for site statistics. (d-f) Statistical results of the number of Fe sites  
 109 corresponding to different catalysts.

110

111 We compared the activities of catalysts with different Fe introduction (0.1%, 0.25% and 0.5%  
 112 Fe/MnO<sub>2</sub>), and found that 0.25% Fe/MnO<sub>2</sub> exhibited the highest catalytic activity (Supplementary Fig.  
 113 7a). According to the statistical analysis of iron atoms distribution on the surface of three catalysts  
 114 (Supplementary Fig. 16 and Supplementary Table 2), 0.1% Fe/MnO<sub>2</sub> possessed 81.4% of monatomic Fe,  
 115 while 0.25% Fe/MnO<sub>2</sub> was of 75.3% two adjacent single-atom Fe sites. When the content of Fe reached  
 116 0.5%, the adjacent Fe sites ( $n > 2$ ) became dominant (73.2%). Obviously, the catalytic activity of  
 117 Fe/MnO<sub>2</sub> strongly depends on the surrounding environment of iron atoms and their interaction with  
 118 MnO<sub>2</sub> support.

119

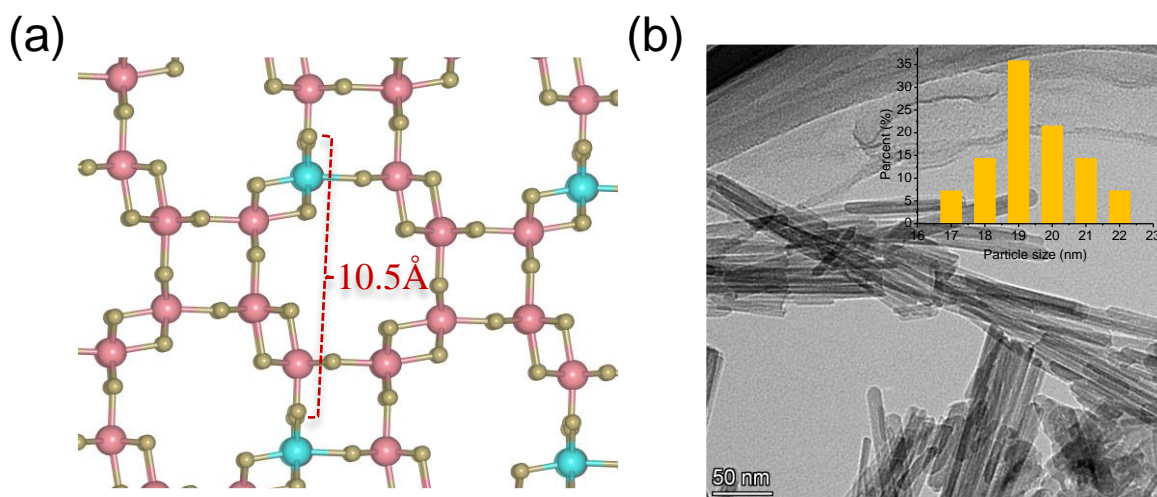

120

121 **Supplementary Figure 17.** (a) The structural model and (b) TEM spectrum of Fe/MnO<sub>2</sub>. Particle size  
 122 was counted according to TEM result.

123

124 Based on the strength of atoms and the distance between adjacent atoms, we statistically analyzed  
 125 the STEM spectra of 300 atoms in three regions on the surface of three different Fe/MnO<sub>2</sub> catalysts  
 126 (0.1%, 0.25% and 0.5% Fe/MnO<sub>2</sub>) in Supplementary Fig. 16 and Supplementary Table 2. For 0.25%  
 127 Fe/MnO<sub>2</sub>, 89 of 300 atoms on the surface were counted as Fe atoms, and others as Mn atoms.  
 128 According to the model structure of Fe/MnO<sub>2</sub> (Supplementary Fig. 17), the height of the monolayer  
 129 atoms is 2.63 Å (h). The TEM results displayed that the thickness of the nanorods was about 19.7 nm  
 130 (H), consistent with the literature<sup>4</sup>. On the basis of calculation formulas (5-9), the mass fraction of Fe  
 131 was 0.46%, very close to the ICP test results (0.3%), if the impurities adsorbed on the surface were  
 132 ignored. These results have demonstrated that Fe is distributed as a single atom on the surface of  
 133 Fe/MnO<sub>2</sub>, and it is feasible to distinguish Mn and Fe atoms according to the differences in strength and  
 134 distance.

135

136

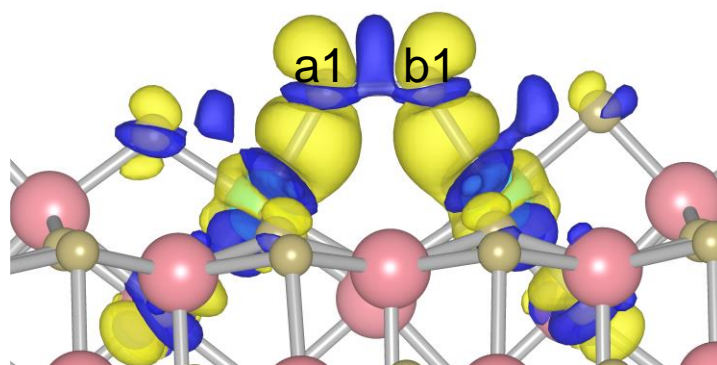

| Oxygen atom  | a1    | b1    |
|--------------|-------|-------|
| Bader Charge | -0.12 | -0.12 |

137

138 **Supplementary Figure 18.** The difference charge density of O<sub>2</sub> adsorbed on Fe/MnO<sub>2</sub>. Different  
139 oxygen atoms from adsorbed oxygen species were labeled as a1 and b1, and corresponding Bader  
140 charge was recorded in the bottom of charge density map. The charge density of yellow and blue  
141 represents the concentrated and scarce electrostatic potential scale respectively.

142

143

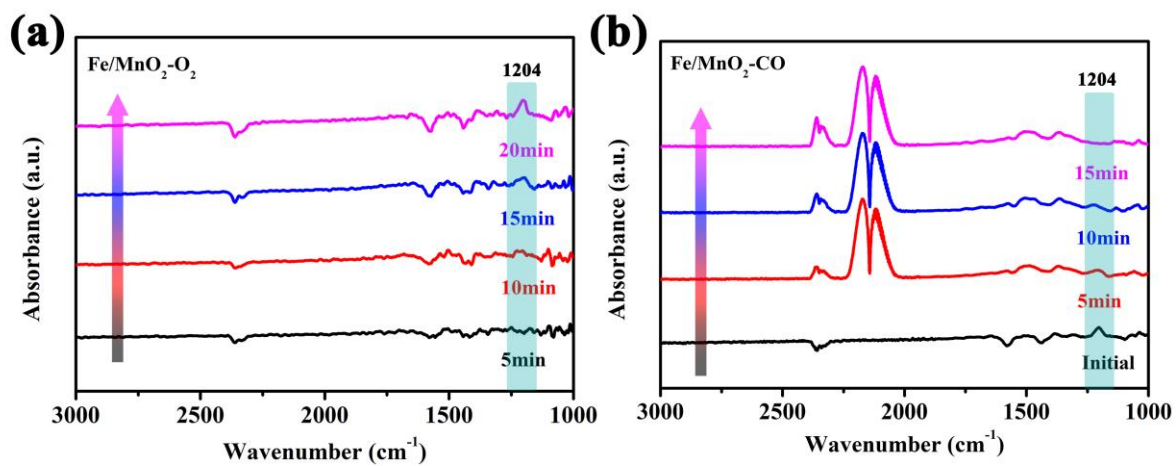

144

145 **Supplementary Figure 19.** In situ DRIFTS over Fe/MnO<sub>2</sub> in a continuous flow of (a) 4% O<sub>2</sub>/N<sub>2</sub> and

146 (b) 1% CO/N<sub>2</sub> over time at 40 °C.

147

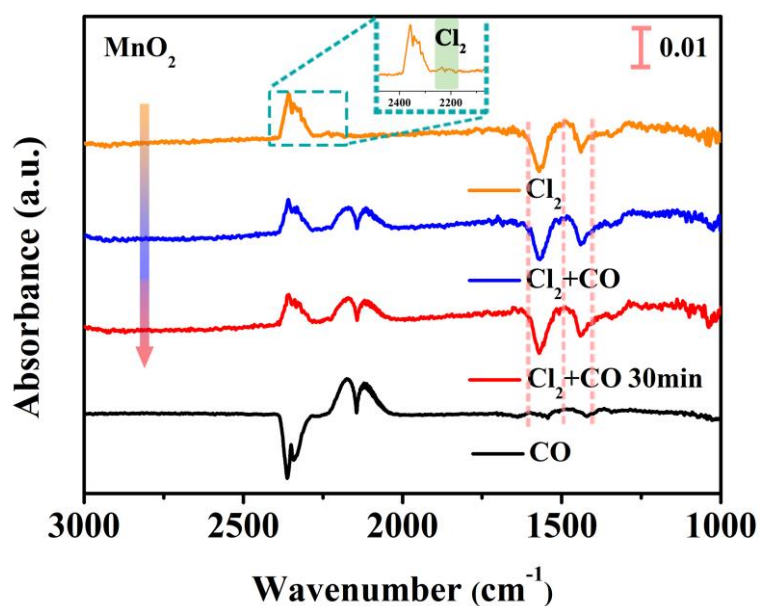

149

150 **Supplementary Figure 20.** In situ DRIFTS of  $\text{MnO}_2$  with injection of  $\text{Cl}_2$  in closed reactor at  $40^\circ\text{C}$ ,  
 151 followed by CO and maintained for 30 min. The bottom line as a reference is recorded in the CO  
 152 atmosphere. The inset shows partially enlarged spectra in  $\text{Cl}_2$  atmosphere.

153

154 Chlorine is well known for its high electron density and strong adsorption properties. Some  
 155 literatures reported that chlorine was prone to form strong adsorption with metal sites on the catalyst  
 156 surface during the catalytic reaction, leading to catalyst deactivation<sup>5,6</sup>. Even after oxygen adsorption,  
 157  $\text{Cl}_2$  could cover the surface of  $\text{MnO}_2$  and firmly occupied the adsorption sites of CO. Furthermore,  $\text{Cl}_2$   
 158 has a stronger adsorption capacity at unsaturated Mn sites than CO ( $-3.11\text{ eV}$  for  $\text{Cl}_2$  versus  $-2.15\text{ eV}$  for  
 159 CO), accounting for the design idea of the experiment. Therefore, we used  $\text{Cl}_2$  to study the reaction  
 160 mechanism in this study. After  $\text{Cl}_2$  was injected into a reactor with  $\text{MnO}_2$ , characteristic peaks at  $2270$   
 161 and  $2237\text{ cm}^{-1}$  appeared, which could be attributed to adsorption peaks of  $\text{Cl}_2$  (the inset of  
 162 Supplementary Fig. 20), indicating a strong interaction between  $\text{Cl}_2$  and the  $\text{MnO}_2$  surface.  
 163 Subsequently, CO was injected into the closed system, the spectra has barely changed through 30 min,  
 164 demonstrating that  $\text{Cl}_2$  took priority in the adsorption site of CO and prevented the further occurrence of  
 165 oxidation reaction.

166

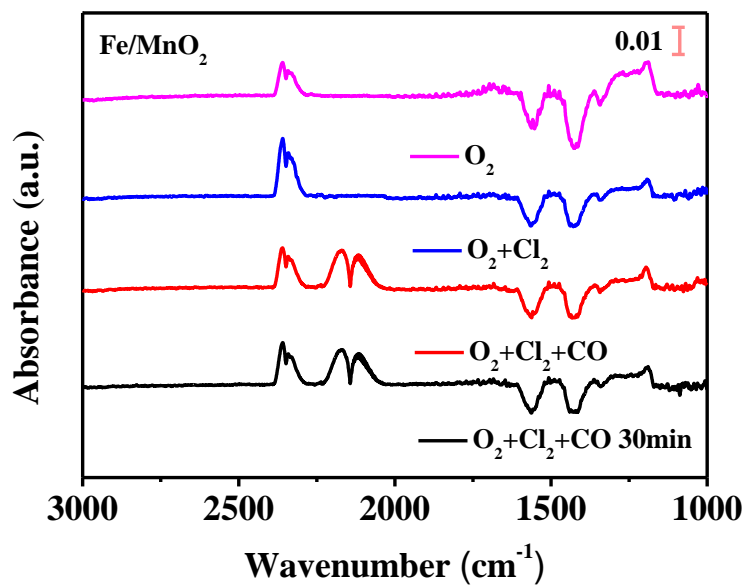

167

168 **Supplementary Figure 21.** In situ DRIFTS of MnO<sub>2</sub> with injection of O<sub>2</sub> in closed reactor at 100 °C,  
169 followed by Cl<sub>2</sub> at 40 °C, then CO at 40 °C, and finally maintained for 30 min.

170

171

172

173

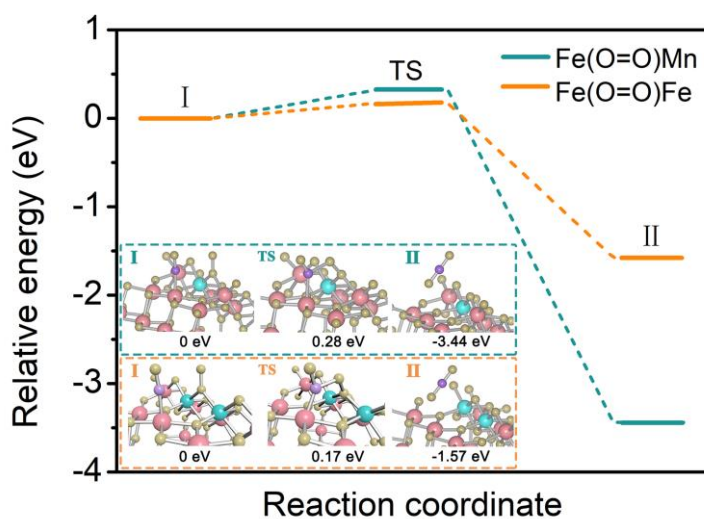

174

175 **Supplementary Figure 22.** Energy profiles of CO reacted with active species Fe(O=O)Mn and  
176 Fe(O=O)Fe. The optimized structures of initial states (I), transition states (TS) and final states (II) are  
177 listed in the dotted box, and the relative energy is recorded below the corresponding structure.

178

179 We compared the activation behavior of oxygen at Fe-Mn bimetallic sites. Relatively, the  
180 adsorption capacity of O<sub>2</sub> is weak at the double-center line composed of Fe and Mn (-1.82 eV versus -  
181 2.00 eV for double Fe sites, Supplementary Fig. 13c), which may be the result of the less feedback  $\pi$   
182 electrons transferred to oxygen from Mn d orbital. Referring to the energy profile of CO reacted with  
183 oxygen species at different active sites, remarkably, Fe(O=O)Fe performs lower potential barrier (0.17  
184 eV) compared with Fe(O=O)Mn (0.28 eV). Moreover, final state of Fe(O=O)Fe has higher energy,  
185 corresponding to less stability, which is considered to facilitate the further migration of residual oxygen  
186 atoms (part V to VI in Fig. 5). Thus, the double Fe sites possess dominant ability to activate molecular  
187 oxygen.

188

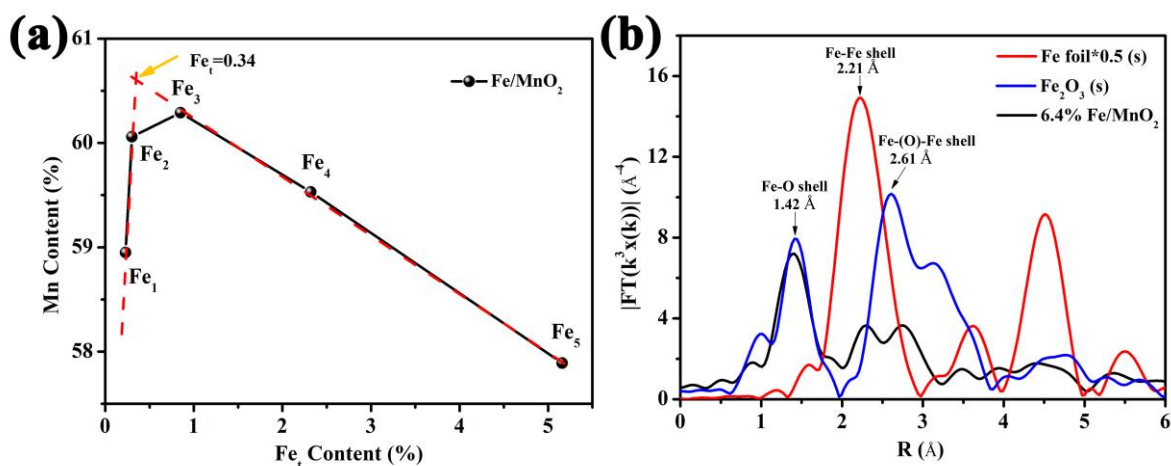

189

190 **Supplementary Figure 23.** (a) The relationship from the contents of Fe and Mn based on the result of  
 191 ICP-OES. (b) The Fourier-transformed k-edge EXAFS spectra in R-space of Fe foil, Fe<sub>2</sub>O<sub>3</sub> and 6.4%  
 192 Fe/MnO<sub>2</sub>.

193

194

195

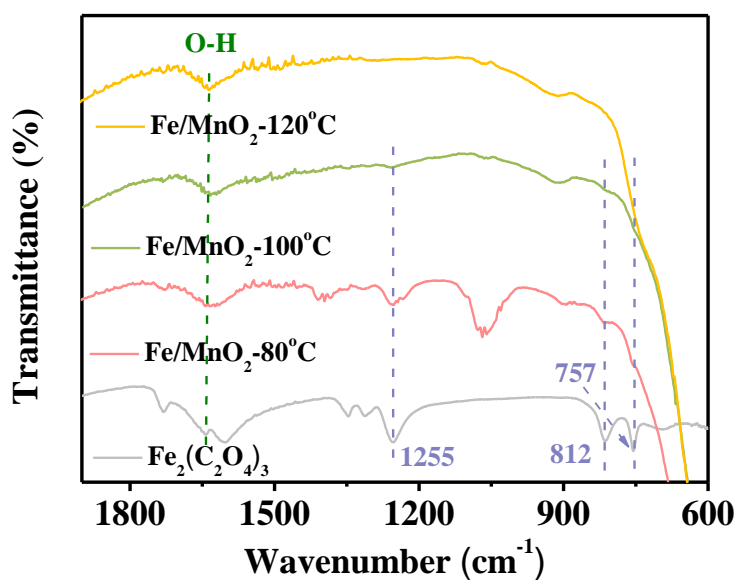

196

197 **Supplementary Figure 24.** ATR spectra of standard Fe<sub>2</sub>(C<sub>2</sub>O<sub>4</sub>)<sub>3</sub> and Fe/MnO<sub>2</sub> synthesized from at  
 198 different temperatures.

199

200



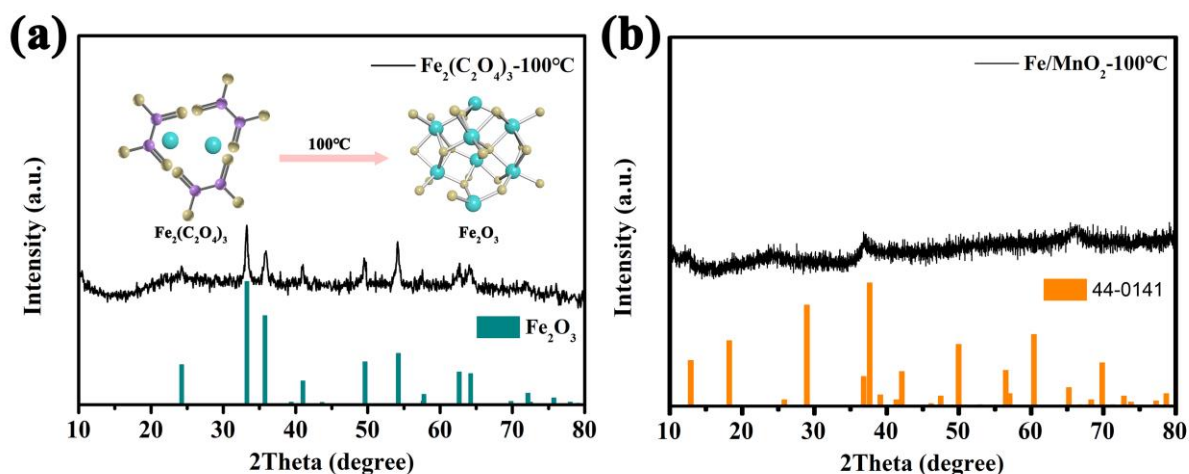

201

202 **Supplementary Figure 25.** XRD patterns of (a)  $\text{Fe}_2(\text{C}_2\text{O}_4)_3$  and (b)  $\text{Fe}/\text{MnO}_2$  prepared at 100 °C. (The  
 203 inset shows the structural models of  $\text{Fe}_2(\text{C}_2\text{O}_4)_3$  and  $\text{Fe}_2\text{O}_3$  in a).

204

205 We conducted ATR measurements of  $\text{Fe}/\text{MnO}_2$  synthesized at different temperatures  
 206 (Supplementary Fig. 24). The characteristic peaks of ferric oxalate ( $757$ ,  $812$  and  $1255\text{ cm}^{-1}$ ) appeared  
 207 in the catalysts synthesized at  $80\text{ °C}$ , which were weakened along with the further increase of the  
 208 synthesis temperatures. In combination with Supplementary Fig. 25 and 26, the iron species existed in  
 209 the precursor solution with the form of iron oxalate complex. With the increase of hydrothermal  
 210 temperature,  $[\text{MnO}_6]$  structural units appeared in priority, resulting in the formation of the periodic  
 211 structure of  $\text{MnO}_2$ . Then, the ferric oxalate was gradually decomposed into  $\text{CO}_2$ , leaving Fe atoms on  
 212 the surface of  $\text{MnO}_2$ .

213

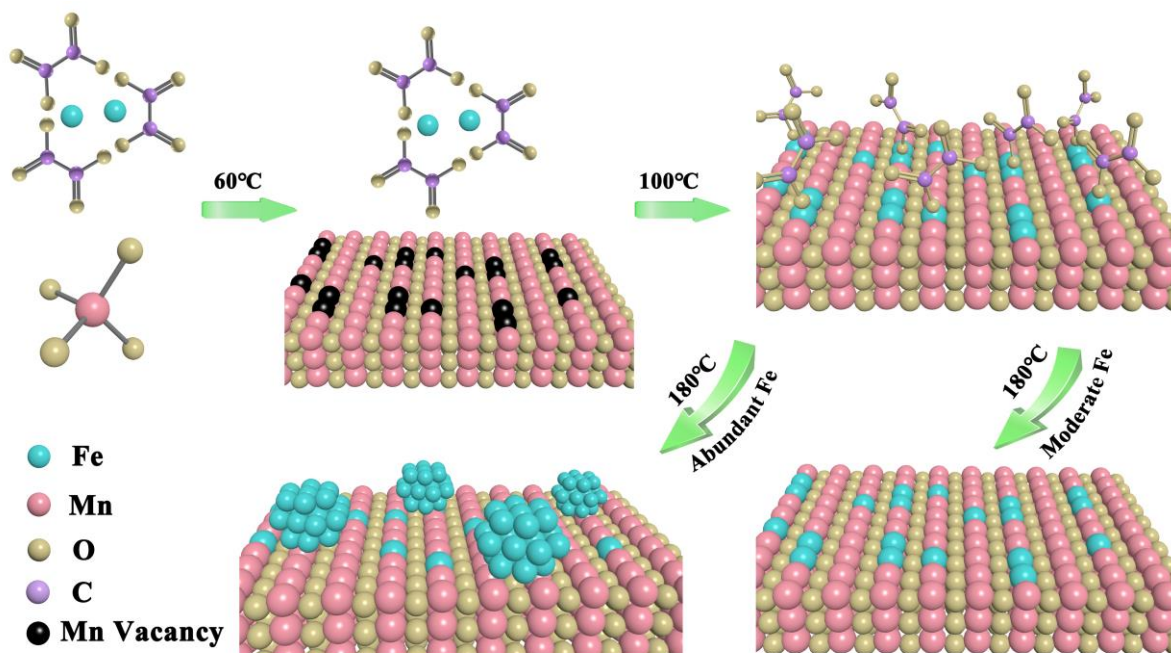

214

215 **Supplementary Figure 26.** Schematic illustration of growth mechanism of Fe/MnO<sub>2</sub>.

216

217 ICP-OES of Fe/MnO<sub>2</sub> systems with different Fe contents were characterized, and the relative  
 218 contents of Mn and Fe were recorded in Table S6. Interestingly, with increase of actual content of Fe,  
 219 the relative content of Mn increased at first and then decreased. The reasons for the change trend of Mn  
 220 was discussed on the basis of formula:

$$221 \quad C_{\text{Mn}} = \frac{m_{\text{Mn}}}{m_{\text{Mn}} + m_{\text{Fe}} + m_{\text{other}}} \quad (6)$$

222 (1) when the content of Fe was less than 1%, the introduction of Fe led to a sharp decrease in the  
 223 content of other elements ( $m_{\text{other}}$ ), including the content of lattice oxygen or the content of adsorbed  
 224 species on the surface, resulting in the continuous increase in the relative content of Mn; (2) with the  
 225 further increase of Fe content, Fe clusters were formed and covered on the catalyst surface, leading to  
 226 the continuous decrease over the relative content of Mn. Then, the relative relationship between Mn  
 227 and Fe content was used to discuss in Supplementary Fig. 23a, and the contents from Fe<sub>3</sub> to Fe<sub>5</sub> showed  
 228 a good linear relationship. Combined with previous EXAFS analysis results, Fe existed as a single atom  
 229 in Fe<sub>2</sub> catalyst, while Fe clusters appeared in Fe<sub>5</sub> catalyst (Supplementary Fig. 23b). Corresponding to  
 230 the junction point of fitted curve for Fe<sub>1</sub>-Fe<sub>2</sub> and Fe<sub>3</sub>-Fe<sub>5</sub>, the Fe content was 0.34%, which may be the

231 maximum for Fe existed only as a single atom. Therefore, by comparing the catalytic activity of  
232 catalysts with different Fe contents, the catalysts with 0.25% showed the optimal catalytic activity,  
233 which was attributed to the existence state of the monatomic form of Fe.

234 Based on above experimental results, the growth process of the catalyst as exhibited in  
235 Supplementary Fig. 26 maybe went through the following stages: (1) the precursor solution contained  
236  $\text{MnO}_4^-$ ,  $\text{C}_2\text{O}_4^{2-}$ ,  $\text{Fe}^{3+}$  and so on. During the stirring process,  $\text{C}_2\text{O}_4^{2-}$  was prone to form a chelate with  $\text{Fe}^{3+}$ ,  
237 which existed in the form of  $\text{Fe}_2(\text{C}_2\text{O}_4)_3$ . (2) with the increase of temperature,  $\text{MnO}_4^-$  in the reduction of  
238  $\text{C}_2\text{O}_4^{2-}$  continued to generate the defect-rich skeleton of  $\text{MnO}_2$ , while  $\text{Fe}_2(\text{C}_2\text{O}_4)_3$  remained stable in the  
239 solution. (3) when the temperature rose to 100 °C,  $\text{Fe}_2(\text{C}_2\text{O}_4)_3$  began partial decomposition (shown in  
240 Supplementary Fig. 25). Under the action of  $\text{C}_2\text{O}_4^{2-}$  unsaturated coordination, Fe atom kept getting  
241 closer to the  $\text{MnO}_2$  surface with abundant defects, and then occupied the defect sites of Mn. (4) when  
242 the temperature reached the final 180 °C,  $\text{Fe}_2(\text{C}_2\text{O}_4)_3$  was completely decomposed, and Fe existed as a  
243 single atom on the catalyst surface. On the other hand, if the amount of Fe atom far exceeds the number  
244 of defect sites on the catalyst surface, with the decomposition of  $\text{Fe}_2(\text{C}_2\text{O}_4)_3$ , the excess Fe atoms would  
245 continuously gather into Fe clusters and attach to the catalyst surface, thus impeding the adsorption of  
246 reactants on the catalyst surface and inhibiting the further reaction. Therefore,  $\text{C}_2\text{O}_4^{2-}$  acted as a ligand  
247 to disperse Fe atomically, and the chelation ensured Fe dispersed on the surface of  $\text{MnO}_2$ , achieving the  
248 maximum utilization of Fe atom.

249

250

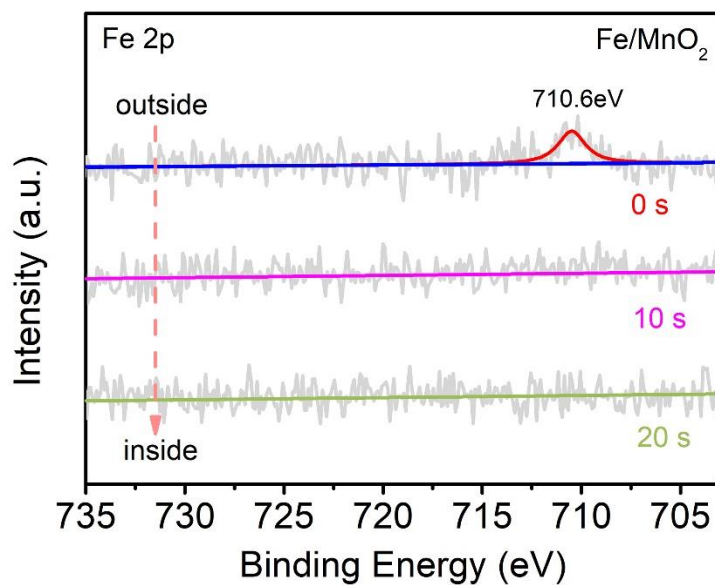

251

252 **Supplementary Figure 27.** Etching XPS spectra of Fe 2*p* in Fe/MnO<sub>2</sub> sample.

253

254 The characteristic peak of 710.6 eV corresponding to Fe species was detected on the surface of the  
255 catalyst by the etching XPS spectra. With the increase of etching time, the characteristic peak  
256 disappeared, indicating that Fe was distributed on the surface of the catalyst, which was consistent with  
257 the experimental results.

258

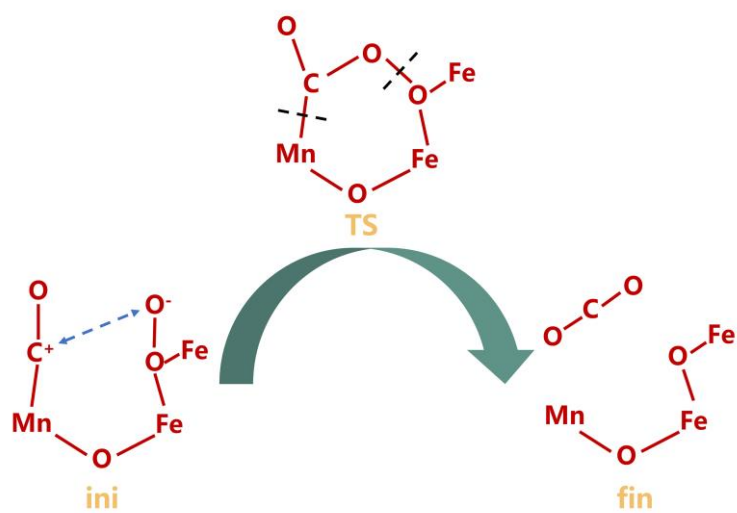

259

260 **Supplementary Figure 28.** Schematic diagram of Fe(O=O)Fe participating in CO oxidation from

261 II→TS1→III in Fig. 5.

262

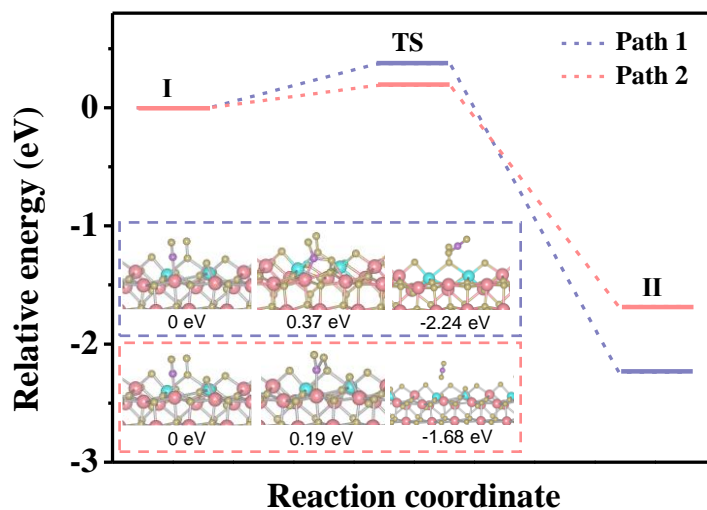

263

264 **Supplementary Figure 29.** Energy profiles of CO reacted through the different path in Fe/MnO<sub>2</sub>. The  
 265 optimized structures of initial states (I), transition states (TS) and final states (II) are listed in the dotted  
 266 box, and the relative energy is recorded below the corresponding structure.

267

268

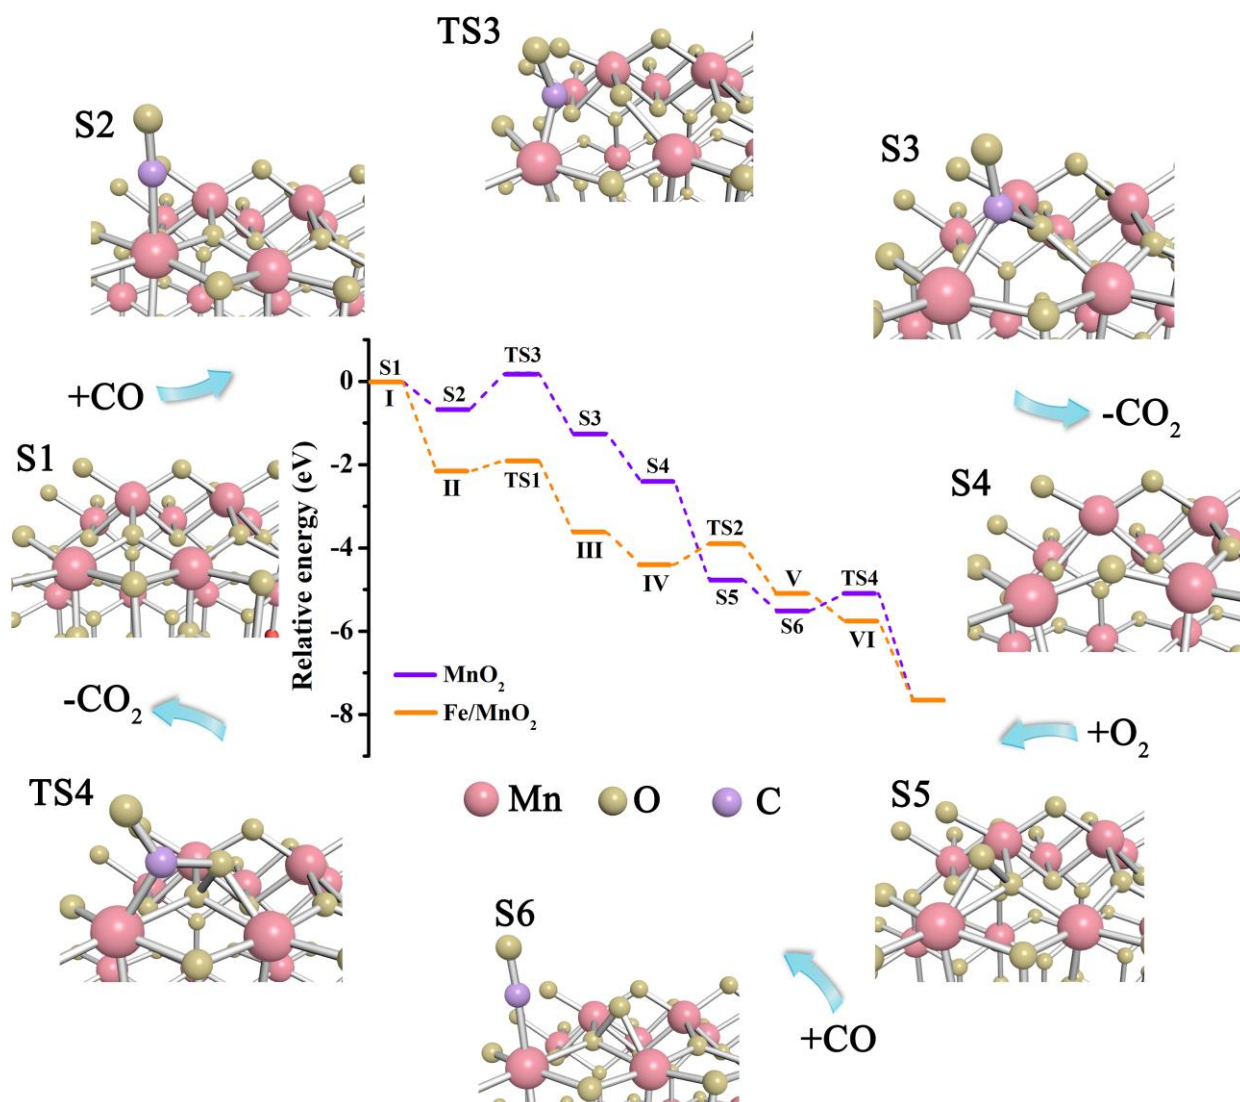

269

270

271 **Supplementary Figure 30.** Proposed reaction mechanism for CO oxidation on MnO<sub>2</sub> surface. The inset  
 272 shows the calculated energy profiles in eV. The structures of intermediates and transition states are  
 273 shown in the reaction cycle. The energy profile of the reaction cycle for Fe/MnO<sub>2</sub> is shown by the  
 274 orange line in the inset (reaction cycle is shown in Fig. 5). The purple line shows the energy profile for  
 275 MnO<sub>2</sub>.

276 In this reaction, CO adsorbed at the Mn site first reacted with the adjacent lattice oxygen to form  
 277 CO<sub>2</sub> and leave V<sub>O</sub>. The surface V<sub>O</sub> was refilled with oxygen molecules, which reacted with another CO  
 278 molecule after that. After the desorption of CO<sub>2</sub>, the catalyst returned to its original state.

279 **Supplementary Tables**280 **Supplementary Table 1.** Surface chemical composition of MnO<sub>2</sub> and Fe/MnO<sub>2</sub> determined by XPS.

281

---

| Catalysts           | Mn <sup>3+</sup> | Mn <sup>4+</sup> | O <sub>ad</sub> <sup>a</sup> | O <sub>latt</sub> <sup>b</sup> | ΔE <sup>c</sup> | AOS <sup>d</sup> |
|---------------------|------------------|------------------|------------------------------|--------------------------------|-----------------|------------------|
| MnO <sub>2</sub>    | 42%              | 58%              | 31%                          | 69%                            | 4.74            | 3.62             |
| Fe/MnO <sub>2</sub> | 53%              | 47%              | 37%                          | 63%                            | 4.90            | 3.44             |

---

282 a. The adsorbed oxygen species on catalyst surface.

283 b. The lattice oxygen species on catalyst surface.

284 c. The binding energy difference (ΔE) according to Mn 3s in XPS.

285 d. The average oxidation state. AOS of Mn was calculated according to the binding energy difference  
286 (ΔE) through an empirical formula: AOS = 8.956–1.126 × ΔE.

287



288 **Supplementary Table 2.** Statistical results of different Fe sites and Mn contents of the three catalysts  
289 from Supplementary Fig. 16.

|                           | Fe(total) | Fe(n=1) | Fe(n=2) | Fe(n>2) | Mn  |
|---------------------------|-----------|---------|---------|---------|-----|
| 0.1% Fe/MnO <sub>2</sub>  | 43        | 35      | 8       | 0       | 257 |
| 0.25% Fe/MnO <sub>2</sub> | 89        | 17      | 67      | 5       | 211 |
| 0.5% Fe/MnO <sub>2</sub>  | 172       | 12      | 34      | 126     | 128 |

290 n represents the number of adjacent Fe atoms.

291

292

293 **Supplementary Table 3.** Fe k-edge EXAFS fitting parameters of Fe/MnO<sub>2</sub> for Fig. 1e.

| Sample              | Shell             | C.N.    | R (Å)     | $\sigma^2$ ( $10^{-3}$ Å) | $\Delta E_0$ (eV) |
|---------------------|-------------------|---------|-----------|---------------------------|-------------------|
| Fe/MnO <sub>2</sub> | Fe-O <sub>1</sub> | 0.9±0.2 | 1.73±0.03 | 5.3±3.5                   | -8.3±0.2          |
|                     | Fe-O <sub>2</sub> | 4.6±0.2 | 1.85±0.03 | 5.3±3.5                   | -8.3±0.2          |

294 C.N.,  $\sigma_2$ , R, and  $\Delta E_0$  are the coordination number, interatomic distance, Debye-Waller factor, and shift in the edge  
 295 energy.

296

297 **Supplementary Table 4.** The measurement condition of apparent activation energy over MnO<sub>2</sub> and  
298 Fe/MnO<sub>2</sub> in different temperature areas.

---

| Catalysts           | Reaction conditions                                                                                          | Ea (kJ mol <sup>-1</sup> )        |
|---------------------|--------------------------------------------------------------------------------------------------------------|-----------------------------------|
| MnO <sub>2</sub>    | 50 mg; 2% CO+4% O <sub>2</sub> +N <sub>2</sub> balance; GHSV = 120,000<br>mL g <sup>-1</sup> h <sup>-1</sup> | 70.1<br>(R <sup>2</sup> = 0.9999) |
| Fe/MnO <sub>2</sub> | 50 mg; 2% CO+4% O <sub>2</sub> +N <sub>2</sub> balance; GHSV = 120,000<br>mL g <sup>-1</sup> h <sup>-1</sup> | 33.7<br>(R <sup>2</sup> = 0.9956) |

---

299

300 **Supplementary Table 5.** The measurement results of the MnO<sub>2</sub> and Fe/MnO<sub>2</sub> catalysts from BET.

---

| Catalysts           | Surface area (m <sup>2</sup> g <sup>-1</sup> ) | Pore volume (cm <sup>3</sup> g <sup>-1</sup> ) | Pore diameter (nm) |
|---------------------|------------------------------------------------|------------------------------------------------|--------------------|
| MnO <sub>2</sub>    | 126.1                                          | 0.378                                          | 12.3               |
| Fe/MnO <sub>2</sub> | 136.2                                          | 0.280                                          | 6.8                |

---

301

302 **Supplementary Table 6.** The content of Fe, Mn on MnO<sub>2</sub> and Fe/MnO<sub>2</sub> with different percentage  
303 content determined by ICP-OES.

---

| Catalysts           | Number          | Fe <sub>t</sub> <sup>a</sup> (%) | Fe <sub>t</sub> <sup>b</sup> (%) | Mn (%) |
|---------------------|-----------------|----------------------------------|----------------------------------|--------|
| MnO <sub>2</sub>    | Fe <sub>0</sub> | 0                                | 0                                | 56.47  |
| Fe/MnO <sub>2</sub> | Fe <sub>1</sub> | 0.1                              | 0.23                             | 58.95  |
| Fe/MnO <sub>2</sub> | Fe <sub>2</sub> | 0.25                             | 0.3                              | 60.06  |
| Fe/MnO <sub>2</sub> | Fe <sub>3</sub> | 1                                | 0.85                             | 60.29  |
| Fe/MnO <sub>2</sub> | Fe <sub>4</sub> | 3.2                              | 2.32                             | 59.53  |
| Fe/MnO <sub>2</sub> | Fe <sub>5</sub> | 6.4                              | 5.16                             | 57.89  |

---

304 a. The theoretical content of Fe based on the calculation.

305 b. The actual content of Fe according to the results of ICP-OES.

306

307 **Supplementary Table 7.** The integrated O<sub>2</sub>-TPD and H<sub>2</sub>-TPR peak area normalized for Fe/MnO<sub>2</sub> and  
 308 MnO<sub>2</sub>.

309

310 *From O<sub>2</sub>-TPD measurements*

311

| Catalysts           | FeOO                              | VO <sub>2</sub> | S-O <sub>latt</sub><br>(Mn <sup>3+</sup> or Fe <sup>3+</sup> ) | S-O <sub>latt</sub><br>(Mn <sup>4+</sup> ) | B-O <sub>latt</sub><br>(Mn <sup>4+</sup> ) |
|---------------------|-----------------------------------|-----------------|----------------------------------------------------------------|--------------------------------------------|--------------------------------------------|
|                     | Percentage of desorption area (%) |                 |                                                                |                                            |                                            |
| MnO <sub>2</sub>    | 0                                 | 6.53            | 20.19                                                          | 43.32                                      | 29.96                                      |
| Fe/MnO <sub>2</sub> | 9.08                              | 17.32           | 37.77                                                          | 21.57                                      | 14.27                                      |

312

313 *From H<sub>2</sub>-TPR measurements*

314

| Catalysts           | FeOO                             | VO <sub>2</sub> | Surface<br>(Mn <sup>3+</sup> or Fe <sup>3+</sup> ) | Surface<br>(Mn <sup>4+</sup> ) | Bulk<br>(Mn <sup>4+</sup> ) |
|---------------------|----------------------------------|-----------------|----------------------------------------------------|--------------------------------|-----------------------------|
|                     | Percentage of reduction area (%) |                 |                                                    |                                |                             |
| MnO <sub>2</sub>    | 0                                | 17.31           | 11.50                                              | 15.68                          | 55.52                       |
| Fe/MnO <sub>2</sub> | 12.12                            | 8.94            | 11.53                                              | 12.77                          | 54.64                       |

315

316 **Supplementary Table 8.** Calculated energy and zero-point energy of the corresponding free and  
317 adsorbed molecules.

| Configuration         | Energy (eV) | Zero Point Energy (eV) | Corrected Energy (eV) |
|-----------------------|-------------|------------------------|-----------------------|
| Fe-Fe-O <sub>2</sub>  | -545.52     | 0.08                   | -545.44               |
| Fe-O-O-Fe             | -544.97     | 0.06                   | -544.91               |
| Fe-Mn-O <sub>2</sub>  | -545.25     | 0.07                   | -545.18               |
| Fe-Mn-VO <sub>2</sub> | -547.20     | 0.05                   | -547.15               |
| Mn-O <sub>2</sub>     | -545.19     | 0.09                   | -545.10               |
| Mn-CO                 | -551.88     | 0.12                   | -551.76               |
| Mn-VO <sub>2</sub> -1 | -548.80     | 0.05                   | -548.75               |
| Mn-VO <sub>2</sub> -2 | -548.13     | 0.08                   | -548.05               |
| Cl <sub>2</sub> -Mn   | -540.66     | 0.01                   | -540.65               |
| O <sub>2</sub>        | -8.84       | 0.10                   | -8.74                 |
| CO                    | -14.80      | 0.13                   | -14.67                |
| Cl <sub>2</sub>       | -3.58       | 0.03                   | -3.55                 |

318

319

320

321 **Supplementary Table 9.** Energy changes for CO oxidation over Fe/MnO<sub>2</sub> and MnO<sub>2</sub> surface via DFT  
 322 calculation.

| Fe/MnO <sub>2</sub> |                      | MnO <sub>2</sub>              |                      |
|---------------------|----------------------|-------------------------------|----------------------|
| Step in Fig. 5      | Relative energy (eV) | Step in Supplementary Fig. 30 | Relative energy (eV) |
| I                   | 0                    | S1                            | 0                    |
| II                  | -2.159               | S2                            | -0.657               |
| TS1                 | -1.989               | TS3                           | 0.203                |
| III                 | -3.623               | S3                            | -1.247               |
| IV                  | -4.404               | S4                            | -2.408               |
| TS2                 | -3.894               | S5                            | -4.749               |
| VI                  | -5.105               | S6                            | -5.505               |
| VI                  | -5.769               | TS4                           | -5.095               |
| Final state         | -7.654               | Final state                   | -7.654               |

323



## 324 **Supplementary References**

- 325 1 Montemore, M. M., van Spronsen, M. A., Madix, R. J. & Friend, C. M. O<sub>2</sub> activation by metal  
326 surfaces: implications for bonding and reactivity on heterogeneous catalysts. *Chem. Rev.* **118**,  
327 2816-2862 (2018).
- 328 2 Gan, T. et al. Electron donation of non-oxide supports boosts O<sub>2</sub> activation on nano-platinum  
329 catalysts. *Nat. Commun.* **12**, 2741 (2021).
- 330 3 R. D. L. Smith, C. Pasquini, S. Loos, P. Chernev, K. Klingan, P. Kubella, M. R. Mohammadi, D.  
331 Gonzalez-Flores, H. Dau, *Nat. Commun.* **8**, 2022 (2017).
- 332 4 Rong, S., Zhang, P., Liu, F. & Yang, Y. Engineering crystal facet of  $\alpha$ -MnO<sub>2</sub> nanowire for highly  
333 efficient catalytic oxidation of carcinogenic airborne formaldehyde. *ACS Catal.* **8**, 3435-3446,  
334 (2018).
- 335 5 He, C. et al. Recent advances in the catalytic oxidation of volatile organic compounds: a review  
336 based on pollutant sorts and sources. *Chem. Rev.* **119**, 4471-4568 (2019).
- 337 6 Dai, Q. et al. HCl-tolerant H<sub>x</sub>PO<sub>4</sub>/RuO<sub>x</sub>-CeO<sub>2</sub> catalysts for extremely efficient catalytic  
338 elimination of chlorinated VOCs. *Environ. Sci. Technol.* **55**, 4007-4016 (2021).
