# Supplementary material for: Adjacent single-atom irons boosting molecular oxygen activation on MnO2
Source: PubMed Central journal article supplement (PMC8440510; doi:10.1038/s41467-021-25726-w), 2021-09-14
Supplement: 41467_2021_25726_MOESM2_ESM.pdf [file 41467_2021_25726_MOESM2_ESM.pdf]

## Peer Review File

---

Title: Adjacent single-atom irons boosting molecular oxygen activation on MnO<sub>2</sub>

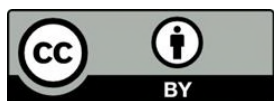

**Open Access** This file is licensed under a Creative Commons Attribution 4.0 International License, which permits use, sharing, adaptation, distribution and reproduction in any medium or format, as long as you give appropriate credit to the original author(s) and the source, provide a link to the Creative Commons license, and indicate if changes were made. In the cases where the authors are anonymous, such as is the case for the reports of anonymous peer reviewers, author attribution should be to 'Anonymous Referee' followed by a clear attribution to the source work. The images or other third party material in this file are included in the article's Creative Commons license, unless indicated otherwise in a credit line to the material. If material is not included in the article's Creative Commons license and your intended use is not permitted by statutory regulation or exceeds the permitted use, you will need to obtain permission directly from the copyright holder. To view a copy of this license, visit <http://creativecommons.org/licenses/by/4.0/>.

## <b>REVIEWER COMMENTS</B>

### Reviewer #1 (Remarks to the Author):

In this manuscript, the authors have explored the CO oxidation process on the binuclear metal site of the heterogeneous Fe/MnO<sub>2</sub> catalyst. Sophisticated techniques and theoretic calculations have been employed to characterize the site, analyze its properties and explain the catalytic mechanism. It describes an interesting idea on how to activate oxygen with such a binuclear site in the complex catalysis process. However, the main conclusions are not convincing based on the provided experimental evidence. Thus I could not recommend its acceptance in its current form.

1. The concept of “Binuclear single-atom” in the title is really confusing and frustrating. It is common sense that each atom only has one nucleus. It seems that the term actually means a two-Fe-atom site or bi-atomic or “binuclear iron” site in the text. Why on earth do the authors use the “single-atom” concept?
2. The existence of binuclear iron sites is demonstrated with the HAADF-STEM images, but unfortunately other sites like single or triple iron atoms cannot be excluded. It's hard to believe that all iron atoms maintain the binuclear configuration. It seems that the manuscript selectively presents a few examples of neighboring binuclear iron atoms. Even so, one can still find that there is at least a single iron atom in Fig. S11 (4). Therefore the manuscript should provide the statistical distribution of the sites as a function of iron atom number inside.
3. It's not a good choice to directly compare the activities of Fe/MnO<sub>2</sub> and MnO<sub>2</sub> because typically a metal entity possesses a higher activity than an oxide support for the CO oxidation no matter how the metal atoms are dispersed on the oxide.
4. There is not strong evidence to prove the existence of the Fe(O=O)Fe intermediate. A new oxygen species is confirmed by O<sub>2</sub>-TPD and H<sub>2</sub>-TPR, but it could be any type of active oxygen species. The O1s XPS in Fig. S8c simply indicates the oxide peak and the wide feature of adsorbed oxygen is not any clue of surface-adsorbed O<sub>2</sub> species. Even if the oxygen adsorbs on the surface as O=O, there is no evidence to show that it sits in between two iron atoms.
5. The 1204 cm<sup>-1</sup> band in Fig. 3f is supposed to be relating to the Fe(O=O)Fe species. However, the authors should tell the readers that such a decrease in the wavenumber is indeed from the isotopic effect for the Fe(O=O)Fe species. The Fe(O=O)Fe species is non-polar, how could the O-O vibrational mode appear in IR? DFT could help calculate all vibrational modes of the proposed Fe(O=O)Fe species. Such calculations should be included.
6. An additional question about the blank experiment on the structure of the Fe/MnO<sub>2</sub> catalyst in Figure 1f: is there any oxygen molecule between the iron atoms at the binuclear site before O<sub>2</sub> adsorption takes place? According to the analysis in the manuscript, the active site should be Fe-(Ov)-Fe, then how can the O<sub>2</sub> molecule be adsorbed to form Fe(O=O)Fe? The EXAFS result does show the existence of Fe-O and Fe-(O)-Fe. Normally, Mn-O-Mn should be stable in the MnO<sub>2</sub> structure. Therefore, Fe-O-Fe should be more stable than Fe-(Ov)-Fe and Fe(O=O)Fe, then why is Fe-O-Fe non-existent in Fe/MnO<sub>2</sub>?

Reviewer #2 (Remarks to the Author):

The authors claimed that they demonstrated that dual adjacent single Fe atoms anchored on MnO<sub>2</sub> can assemble into a binuclear site, which activates molecular oxygen to form an active intermediate species Fe(O=O)Fe for highly efficient CO oxidation. It was concluded that binuclear Fe sites exhibited a stronger O<sub>2</sub> activation performance than the conventional surface oxygen vacancy activation sites.

However, the data provided seems not enough to support their claims. I understood that Fe/MnO<sub>2</sub> showed better CO oxidation performance compared to pure MnO<sub>2</sub> but unfortunately not convinced the formation of binuclear Fe sites and L-H type reaction. The following is the reasons why I consider it is inadequate, including questions and comments. I hope this will help improve the quality of this author's work and contribute further understanding the physics behind this seminal catalytic reaction.

In Fig.1a, TEM with atomic resolution are shown and Fe and Mn atoms were identified by line profile in Fig. 3b. I assume that they were distinguished by the intensity differences of the bright spots from the line profile. If so, I suggest the authors to show TEM for MnO<sub>2</sub> to confirm that there is no intensity differences among the bright spots and prove intensity difference is inherently from Fe and Mn in Fe/MnO<sub>2</sub>. I can see some bright spots on the surface of pure MnO<sub>2</sub> in HRTEM of Fig. 3a of the following literature, but their intensities are different.

J. Gao et al./Journal of Catalysis 341 (2016) 82-90.

I also suggest showing line profile for longer distance and calculating the Fe coverage to see if it is consistent to the amount of introduced Fe. In some areas, three or more bright spots appear to be lined up.

XAFS was taken for Fe foil (metallic Fe), Fe<sub>2</sub>O<sub>3</sub> (Fe<sup>3+</sup>) and Fe/MnO<sub>2</sub> and spectrum of Fe/MnO<sub>2</sub> is almost the same to that of Fe<sub>2</sub>O<sub>3</sub>. I suggest authors to discuss oxidation state of Fe based on the result of XPS of Fe on Fe/MnO<sub>2</sub> with literatures and Bader charge.

Fourier-transformed k-edge EXAFS for Fe<sub>2</sub>O<sub>3</sub> and Fe/MnO<sub>2</sub> are quite similar. The possibility of formation Fe<sub>2</sub>O<sub>3</sub> was excluded by comparing the Morlet wavelet transform in Supplementary Fig.3 but the results show no significant difference. The k<sup>3</sup>-weighted EXAFS can be judged to check the quality of the measured spectra but not shown. It may not be possible to prove that Fe<sub>2</sub>O<sub>3</sub> is not formed only from the results of this XAFS analysis.

Peaks in Fig 3a is too small to see.

How can you exclude the possibility of MnK on bare MnO<sub>2</sub> surface of Fe/MnO<sub>2</sub>? Is there any evidence that MnK is hindered by Fe atoms?

The Fe(O=O)Fe was suggested to the preferentially adsorbed configuration of O<sub>2</sub> since the adsorption energy is high, however, in the calculation in Supplementary Fig .10, Mn(O=O)Mn was not calculated.

What is the meaning of "molecular oxygen activation" and "activation behavior of oxygen" in line 32 and 181? Is it mentioning low dissociation energy of oxygen molecules? I suggest the authors define the

term and share the physical image clearly before it is used for the readership of this multidisciplinary journal.

In line 24, in introductory part, author described that high concentration of oxygen in air or high temperature will inevitably lead to the refilling of oxygen vacancy by referencing ORR study and not CO oxidation. I don't think this is appropriate citation. There are many studies for oxygen vacancy involved CO oxidation studies. I suggest authors to present discussions based on more relevant literatures. For the same reasons, reference 1 to 3 seems inappropriate (they are electrochemical ORR studies and there should be more relevant references).

Injection of Cl<sub>2</sub> was performed. Is it necessarily be Cl<sub>2</sub>? Why Cl<sub>2</sub>? I recommend authors to add explanation why this way is good for investigating/identifying the CO oxidation mechanism, probably with citing some articles.

In Supplementary Fig. 11 STEM images were shown but two of them are labeled the same. I recommend that you carefully check the other data to make sure there are no misrepresentations. Unit error was found in Line 108 and it should be 167 C, not cm<sup>-1</sup>.

In Supplementary Fig. 6, fitted light off curve for MnO<sub>2</sub> is awkward. Fitting needs to be performed based on the provided data and how you fit needs to be mentioned with reliability factor.

Reviewer #3 (Remarks to the Author):

In this work, the authors report on a novel "single-atom" binuclear iron site embedded in a MnO<sub>2</sub> host lattice. Overall, this work is of very high quality and the findings are corroborated with theoretical study. This kind of earth-abundant material may well serve as the next generation of catalyst for a variety of chemical technologies and this type of fundamental study will be valuable in identifying paths forward in both improving and utilizing such structures. A few minor suggestions that might improve this manuscript:

- 1) While I understand the usage in comparison to previous work, the portion of the title "Binuclear single-atom irons" is a bit problematic as the binuclear and plural of iron both seem to contradict the "single-atom" term. This term is of course somewhat problematic for all "single-atom" sites since local structure can strongly influence key binding sites but even more so here where 2 distinct atoms are serving as the localized active site. A similar issue occurs at the end of the discussion on page 12 where the term "monatomic binuclear active sites" is used.
- 2) Oxygen activation is of course key to a wide variety of (electro)chemical reactions. A sentence on some of the most technologically important applications and some additional discussion on the importance of CO  $\diamond$  CO<sub>2</sub> in particular would help highlight the importance of this work.
- 3) On a technical level, the denticity/binding motif of the bound O<sub>2</sub> as brought up on page 7 and Figure S10 could be strengthened somewhat. In particular, it seems odd to not have considered and reported

on the energetics of the O<sub>2</sub> with 1 O bonded to each of the Fe atoms, even if it is indeed higher energy than the O<sub>2</sub> bridging the 2 Fe with a single O. Also, based on equation 5, it appears that binding does not include vibrational contributions to the free energy including zero-point energies. Given how close some of the competing binding sites are for the O<sub>2</sub>, these effects may well shift binding energetics, especially for different binding motifs which should be addressed.

1 REVIEWER COMMENTS

2  
3 Reviewer #1 (Remarks to the Author):  
4

5 In this manuscript, the authors have explored the CO oxidation process on the  
6 binuclear metal site of the heterogeneous Fe/MnO<sub>2</sub> catalyst. Sophisticated techniques  
7 and theoretic calculations have been employed to characterize the site, analyze its  
8 properties and explain the catalytic mechanism. It describes an interesting idea on  
9 how to activate oxygen with such a binuclear site in the complex catalysis process.  
10 However, the main conclusions are not convincing based on the provided  
11 experimental evidence. Thus I could not recommend its acceptance in its current form.  
12

13 1. The concept of “Binuclear single-atom” in the title is really confusing and  
14 frustrating. It is common sense that each atom only has one nucleus. It seems that the  
15 term actually means a two-Fe-atom site or bi-atomic or “binuclear iron” site in the  
16 text. Why on earth do the authors use the “single-atom” concept?  
17

18 2. The existence of binuclear iron sites is demonstrated with the HAADF-STEM  
19 images, but unfortunately other sites like single or triple iron atoms cannot be  
20 excluded. It’s hard to believe that all iron atoms maintain the binuclear configuration.  
21 It seems that the manuscript selectively presents a few examples of neighboring  
22 binuclear iron atoms. Even so, one can still find that there is at least a single iron atom  
23 in Fig. S11 (4). Therefore the manuscript should provide the statistical distribution of  
24 the sites as a function of iron atom number inside.  
25

26 3. It’s not a good choice to directly compare the activities of Fe/MnO<sub>2</sub> and MnO<sub>2</sub>  
27 because typically a metal entity possesses a higher activity than an oxide support for  
28 the CO oxidation no matter how the metal atoms are dispersed on the oxide.  
29

30 4. There is not strong evidence to prove the existence of the Fe(O=O)Fe intermediate.  
31 A new oxygen species is confirmed by O<sub>2</sub>-TPD and H<sub>2</sub>-TPR, but it could be any type  
32 of active oxygen species. The O1s XPS in Fig. S8c simply indicates the oxide peak  
33 and the wide feature of adsorbed oxygen is not any clue of surface-adsorbed O<sub>2</sub>  
34 species. Even if the oxygen adsorbs on the surface as O=O, there is no evidence to  
35 show that it sits in between two iron atoms.  
36

37 5. The 1204 cm<sup>-1</sup> band in Fig. 3f is supposed to be relating to the Fe(O=O)Fe species.  
38 However, the authors should tell the readers that such a decrease in the wavenumber  
39 is indeed from the isotopic effect for the Fe(O=O)Fe species. The Fe(O=O)Fe species  
40 is non-polar, how could the O-O vibrational mode appear in IR? DFT could help  
41 calculate all vibrational modes of the proposed Fe(O=O)Fe species. Such calculations  
42 should be included.  
43

44 6. An additional question about the blank experiment on the structure of the Fe/MnO<sub>2</sub>

45 catalyst in Figure 1f: is there any oxygen molecule between the iron atoms at the  
46 binuclear site before O<sub>2</sub> adsorption takes place? According to the analysis in the  
47 manuscript, the active site should be Fe-(Ov)-Fe, then how can the O<sub>2</sub> molecule be  
48 adsorbed to form Fe(O=O)Fe? The EXAFS result does show the existence of Fe-O  
49 and Fe-(O)-Fe. Normally, Mn-O-Mn should be stable in the MnO<sub>2</sub> structure.  
50 Therefore, Fe-O-Fe should be more stable than Fe-(Ov)-Fe and Fe(O=O)Fe, then why  
51 is Fe-O-Fe non-existent in Fe/MnO<sub>2</sub>?

52

53 Reviewer #2 (Remarks to the Author):

54

55 The authors claimed that they demonstrated that dual adjacent single Fe atoms  
56 anchored on MnO<sub>2</sub> can assemble into a binuclear site, which activates molecular  
57 oxygen to form an active intermediate species Fe(O=O)Fe for highly efficient CO  
58 oxidation. It was concluded that binuclear Fe sites exhibited a stronger O<sub>2</sub> activation  
59 performance than the conventional surface oxygen vacancy activation sites.

60 However, the data provided seems not enough to support their claims. The following  
61 is the reasons why I consider it is inadequate, including questions and comments. I  
62 hope this will help improve the quality of this author's work and contribute further  
63 understanding the physics behind this seminal catalytic reaction.

64

65 In Fig.1a, TEM with atomic resolution are shown and Fe and Mn atoms were  
66 identified by line profile in Fig. 3b. I assume that they were distinguished by the  
67 intensity differences of the bright spots from the line profile. If so, I suggest the  
68 authors to show TEM for MnO<sub>2</sub> to confirm that there is no intensity differences  
69 among the bright spots and prove intensity difference is inherently from Fe and Mn in  
70 Fe/MnO<sub>2</sub>. I can see some bright spots on the surface of pure MnO<sub>2</sub> in HRTEM of Fig.  
71 3a of the following literature, but their intensities are different.

72 J. Gao et al./Journal of Catalysis 341 (2016) 82-90.

73 I also suggest showing line profile for longer distance and calculating the Fe coverage  
74 to see if it is consistent to the amount of introduced Fe. In some areas, three or more  
75 bright spots appear to be lined up.

76

77 XAFS was taken for Fe foil (metallic Fe), Fe<sub>2</sub>O<sub>3</sub> (Fe<sup>3+</sup>) and Fe/MnO<sub>2</sub> and spectrum of  
78 Fe/MnO<sub>2</sub> is almost the same to that of Fe<sub>2</sub>O<sub>3</sub>. I suggest authors to discuss oxidation  
79 state of Fe based on the result of XPS of Fe on Fe/MnO<sub>2</sub> with literatures and Bader  
80 charge.

81 Fourier-transformed k-edge EXAFS for Fe<sub>2</sub>O<sub>3</sub> and Fe/MnO<sub>2</sub> are quite similar. The  
82 possibility of formation Fe<sub>2</sub>O<sub>3</sub> was excluded by comparing the Morlet wavelet  
83 transform in Supplementary Fig.3 but the results show no significant difference. The  
84 k<sup>3</sup>-weighted EXAFS can be judged to check the quality of the measured spectra but  
85 not shown. It may not be possible to prove that Fe<sub>2</sub>O<sub>3</sub> is not formed only from the  
86 results of this XAFS analysis.

87

88 Peaks in Fig 3a is too small to see.

89

90 How can you exclude the possibility of MvK on bare MnO<sub>2</sub> surface of Fe/MnO<sub>2</sub>? Is  
91 there any evidence that MvK is hindered by Fe atoms?

92 The Fe(O=O)Fe was suggested to the preferentially adsorbed configuration of O<sub>2</sub>  
93 since the adsorption energy is high, however, in the calculation in Supplementary  
94 Fig. 10, Mn(O=O)Mn was not calculated.

95

96 What is the meaning of “molecular oxygen activation” and “activation behavior of  
97 oxygen” in line 32 and 181? Is it mentioning low dissociation energy of oxygen  
98 molecules? I suggest the authors define the term and share the physical image clearly  
99 before it is used for the readership of this multidisciplinary journal.

100

101 In line 24, in introductory part, author described that high concentration of oxygen in  
102 air or high temperature will inevitably lead to the refilling of oxygen vacancy by  
103 referencing ORR study and not CO oxidation. I don't think this is appropriate citation.  
104 There are many studies for oxygen vacancy involved CO oxidation studies. I suggest  
105 authors to present discussions based on more relevant literatures. For the same  
106 reasons, reference 1 to 3 seems inappropriate (they are electrochemical ORR studies  
107 and there should be more relevant references).

108

109 Injection of Cl<sub>2</sub> was performed. Is it necessarily be Cl<sub>2</sub>? Why Cl<sub>2</sub>? I recommend  
110 authors to add explanation why this way is good for investigating/identifying the CO  
111 oxidation mechanism, probably with citing some articles.

112

113 In Supplementary Fig. 11 STEM images were shown but two of them are labeled the  
114 same. I recommend that you carefully check the other data to make sure there are no  
115 misrepresentations. Unit error was found in Line 108 and it should be 167 °C, not  
116 cm<sup>-1</sup>.

117

118 In Supplementary Fig. 6, fitted light off curve for MnO<sub>2</sub> is awkward. Fitting needs to  
119 be performed based on the provided data and how you fit needs to be mentioned with  
120 reliability factor.

121

122 Reviewer #3 (Remarks to the Author):

123

124 In this work, the authors report on a novel “single-atom” binuclear iron site embedded  
125 in a MnO<sub>2</sub> host lattice. Overall, this work is of very high quality and the findings are  
126 corroborated with theoretical study. This kind of earth-abundant material may well  
127 serve as the next generation of catalyst for a variety of chemical technologies and this  
128 type of fundamental study will be valuable in identifying paths forward in both  
129 improving and utilizing such structures. A few minor suggestions that might improve  
130 this manuscript:

131

132 1) While I understand the usage in comparison to previous work, the portion of the



133 title “Binuclear single-atom irons” is a bit problematic as the binuclear and plural of  
134 iron both seem to contradict the “single-atom” term. This term is of course somewhat  
135 problematic for all “single-atom” sites since local structure can strongly influence key  
136 binding sites but even more so here where 2 distinct atoms are serving as the localized  
137 active site. A similar issue occurs at the end of the discussion on page 12 where the  
138 term “monatomic binuclear active sites” is used.

139

140 2) Oxygen activation is of course key to a wide variety of (electro)chemical reactions.  
141 A sentence on some of the most technologically important applications and some  
142 additional discussion on the importance of CO  $\diamond$  CO<sub>2</sub> in particular would help  
143 highlight the importance of this work.

144

145 3) On a technical level, the denticity/binding motif of the bound O<sub>2</sub> as brought up on  
146 page 7 and Figure S10 could be strengthened somewhat. In particular, it seems odd to  
147 not have considered and reported on the energetics of the O<sub>2</sub> with 1 O bonded to each  
148 of the Fe atoms, even if it is indeed higher energy than the O<sub>2</sub> bridging the 2 Fe with a  
149 single O. Also, based on equation 5, it appears that binding does not include  
150 vibrational contributions to the free energy including zero-point energies. Given how  
151 close some of the competing binding sites are for the O<sub>2</sub>, these effects may well shift  
152 binding energetics, especially for different binding motifs which should be addressed.

153

## Response Letter

154

155 We thank all three Reviewers for their positive reviews of this manuscripts and the  
156 constructive suggestions that help to improve the scientific presentation of this  
157 manuscript. Point-by-Point responses to address the concerns raised by the three  
158 Reviewers are shown in the following.

159

### 160 **Reviewer #1 (Remarks to the Author):**

161 *In this manuscript, the authors have explored the CO oxidation process on the*  
162 *binuclear metal site of the heterogeneous Fe/MnO<sub>2</sub> catalyst. Sophisticated techniques*  
163 *and theoretic calculations have been employed to characterize the site, analyze its*  
164 *properties and explain the catalytic mechanism. It describes an interesting idea on*  
165 *how to activate oxygen with such a binuclear site in the complex catalysis process.*  
166 *However, the main conclusions are not convincing based on the provided*  
167 *experimental evidence. Thus, I could not recommend its acceptance in its current*  
168 *form.*

169 We thank the Reviewer for confirming the important significance of our findings and  
170 for approving our extensive catalysis studies, and for making many insightful  
171 comments. During the revision, we provided more experimental evidences to support  
172 our conclusions.

173

174 *1. The concept of “Binuclear single-atom” in the title is really confusing and*  
175 *frustrating. It is common sense that each atom only has one nucleus. It seems that the*  
176 *term actually means a two-Fe-atom site or bi-atomic or “binuclear iron” site in the*  
177 *text. Why on earth do the authors use the “single-atom” concept?*

178 **Response:** We thank the reviewer for the insightful comments. To avoid the confusion,  
179 we revised the title into *Adjacent single-atom irons boosting molecular oxygen*  
180 *activation on MnO<sub>2</sub>* and also corrected the relevant term thoroughly in the paper. The  
181 purpose for us to use the concept of single atom is to emphasize the importance of  
182 surrounding environment of iron atoms and their interaction with MnO<sub>2</sub> support on

183 the performance of molecular oxygen activation.

184

185 *2. The existence of binuclear iron sites is demonstrated with the HAADF-STEM*  
186 *images, but unfortunately other sites like single or triple iron atoms cannot be*  
187 *excluded. It's hard to believe that all iron atoms maintain the binuclear configuration.*  
188 *It seems that the manuscript selectively presents a few examples of neighboring*  
189 *binuclear iron atoms. Even so, one can still find that there is at least a single iron*  
190 *atom in Fig. S11 (4). Therefore, the manuscript should provide the statistical*  
191 *distribution of the sites as a function of iron atom number inside.*

192 *Response: We thank the Reviewer for the great suggestion. As shown in Figure S15*  
193 *(Figure S11 in previous submission), single Fe sites were unavoidable during the*  
194 *formation of adjacent iron sites. Therefore, based on the strength of atoms and the*  
195 *distance between adjacent atoms, we statistically analyzed the STEM spectra of 300*  
196 *atoms in three regions on the surface of three different Fe/MnO<sub>2</sub> catalysts (0.1%, 0.25%*  
197 *and 0.5% Fe/MnO<sub>2</sub>) in Figure R1 and Table R1. For 0.25% Fe/MnO<sub>2</sub> shown in the*  
198 *Figure R1b, 1e and Table R1, 80.9% of Fe sites (n = 2 and n > 2) (n represents the*  
199 *number of adjacent Fe atoms) on the surface were distributed as adjacent Fe sites, and*  
200 *a small number (19.1%) as monatomic Fe site. Obviously, these adjacent Fe sites*  
201 *strongly contributed to the efficient activation of molecular oxygen.*

202 *During the revision, Figure R1 and Table R1 were added as the new Supplementary*  
203 *Figure S16 and Table S2 respectively. Meanwhile, we also added more discussions in*  
204 *the revised manuscript on page 8 about the statistical distribution of the sites.*

205

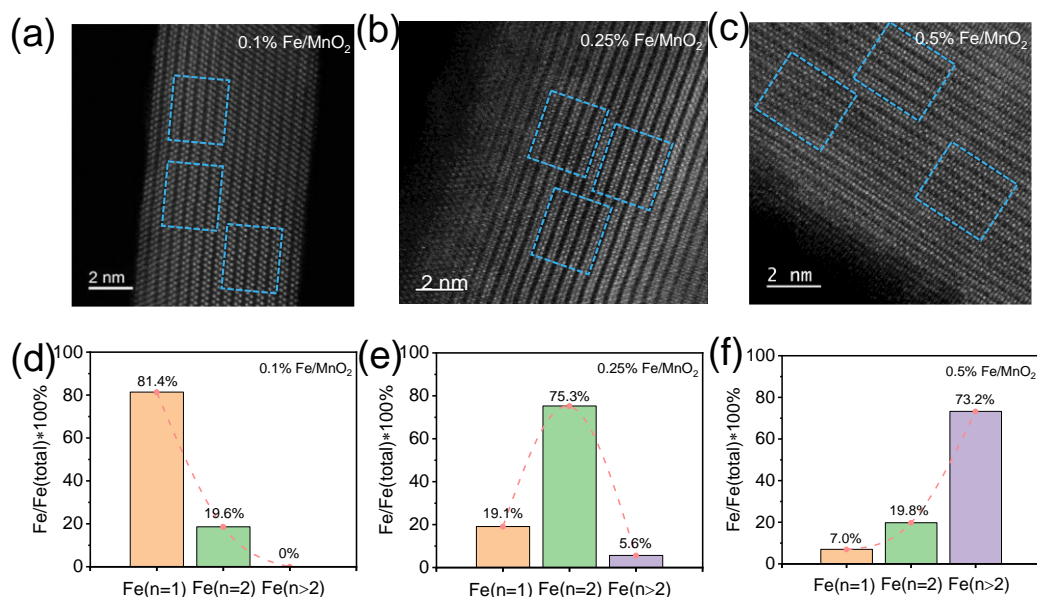

206

207 Figure R1. (a-c) STEM images of different Fe/MnO<sub>2</sub> catalysts. The atoms surrounded  
 208 by the blue dotted box are used for site statistics. (d-f) Statistical results of the number  
 209 of Fe sites corresponding to different catalysts.

210

211 Table R1. Statistical results of different Fe sites and Mn contents of the three catalysts  
 212 from Figure R1.

|                           | Fe(total) | Fe(n=1) | Fe(n=2) | Fe(n>2) | Mn  |
|---------------------------|-----------|---------|---------|---------|-----|
| 0.1% Fe/MnO <sub>2</sub>  | 43        | 35      | 8       | 0       | 257 |
| 0.25% Fe/MnO <sub>2</sub> | 89        | 17      | 67      | 5       | 211 |
| 0.5% Fe/MnO <sub>2</sub>  | 172       | 12      | 34      | 126     | 128 |

213

214 *n* represents the number of adjacent Fe atoms.

215

216 3. It's not a good choice to directly compare the activities of Fe/MnO<sub>2</sub> and MnO<sub>2</sub>  
 217 because typically a metal entity possesses a higher activity than an oxide support for  
 218 the CO oxidation no matter how the metal atoms are dispersed on the oxide.

219 Response: We thank the reviewer for this valuable comment. As the reviewer  
 220 mentioned, a metal usually possesses a higher activity than an oxide support in CO  
 221 oxidation reaction. Therefore, we compared the activities of catalysts with different Fe  
 222 contents (0.1%, 0.25% and 0.5% Fe/MnO<sub>2</sub>), and found that 0.25% Fe/MnO<sub>2</sub> exhibited  
 223 the highest catalytic activity (Figure R2). According to the statistical analysis of iron

224 atoms distribution on the surface of three catalysts (Figure R1 and Table R1), 0.1%  
225 Fe/MnO<sub>2</sub> possessed 81.4% of monatomic Fe, while 0.25% Fe/MnO<sub>2</sub> was of 75.3%  
226 two adjacent Fe sites. When the content of Fe reached 0.5%, the adjacent Fe sites ( $n >$   
227 2) became dominant (73.2%). Obviously, the catalytic activity of Fe/MnO<sub>2</sub> strongly  
228 depends on the surrounding environment of iron atoms and their interaction with  
229 MnO<sub>2</sub> support.

230 *During the revision, we added the corresponding discussion on page 17 in the revised*  
231 *Supporting Information as follows. “We compared the activities of catalysts with*  
232 *different Fe introduction (0.1%, 0.25% and 0.5% Fe/MnO<sub>2</sub>), and found that 0.25%*  
233 *Fe/MnO<sub>2</sub> exhibited the highest catalytic activity (Figure S7a). According to the*  
234 *statistical analysis of iron atoms distribution on the surface of three catalysts*  
235 *(Figure S16 and Table S2), 0.1% Fe/MnO<sub>2</sub> possessed 81.4% of monatomic Fe, while*  
236 *0.25% Fe/MnO<sub>2</sub> was of 75.3% two adjacent single-atom Fe sites. When the content*  
237 *of Fe reached 0.5%, the adjacent Fe sites ( $n > 2$ ) became dominant (73.2%).*  
238 *Obviously, the catalytic activity of Fe/MnO<sub>2</sub> strongly depends on the surrounding*  
239 *environment of iron atoms and their interaction with MnO<sub>2</sub> support.”*

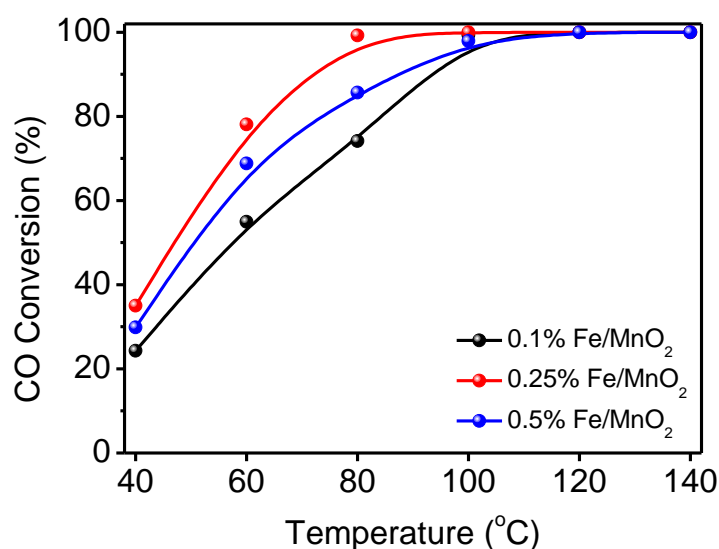

240  
241 Figure R2. Light-off curves for CO oxidation of different proportions of Fe/MnO<sub>2</sub>.

242

243 4. There is not strong evidence to prove the existence of the Fe(O=O)Fe intermediate.

244 A new oxygen species is confirmed by O<sub>2</sub>-TPD and H<sub>2</sub>-TPR, but it could be any type

245 *of active oxygen species. The O1s XPS in Fig. S8c simply indicates the oxide peak and*  
246 *the wide feature of adsorbed oxygen is not any clue of surface-adsorbed O<sub>2</sub> species.*  
247 *Even if the oxygen adsorbs on the surface as O=O, there is no evidence to show that it*  
248 *sits in between two iron atoms.*

249 *Response: Thanks a lot for the comment. During the revision, we employed in-situ*  
250 *DRIFTS with <sup>18</sup>O<sub>2</sub> isotope to further confirm the existence of the Fe(O=O)Fe*  
251 *intermediate on the surface of Fe/MnO<sub>2</sub>, and found that the characteristic peak of*  
252 *1204 cm<sup>-1</sup> shifted to the direction of low wavenumber owing to isotopic effect (Figure*  
253 *R3), suggesting this peak was associated with O<sub>2</sub>. As for MnO<sub>2</sub>, the in-situ DRIFTS*  
254 *with <sup>16</sup>O<sub>2</sub> did not display any peaks near 1204 cm<sup>-1</sup> (Figure R4). Accordingly, the*  
255 *adsorption site of O<sub>2</sub> was related to Fe species. In light of the calculation results*  
256 *(Figure R5) that O<sub>2</sub> was adsorbed on the two adjacent Fe sites (-2.00 eV) with the*  
257 *highest adsorption energy, the Fe(O=O)Fe was the most favorable adsorption*  
258 *configuration. Furthermore, we calculated the infrared spectra of Fe/MnO<sub>2</sub> and*  
259 *Fe/MnO<sub>2</sub> with O<sub>2</sub> adsorption in the configuration of Fe(O=O)Fe (Figure R6). In the*  
260 *simulated infrared spectrum of Fe/MnO<sub>2</sub> with O<sub>2</sub> adsorption, a new characteristic*  
261 *peak appeared near 1200 cm<sup>-1</sup>. We also performed the EXAFS fitting of Fe(O=O)Fe,*  
262 *which were highly coincident with the experimental results (Figure R7). Therefore,*  
263 *we believed that O<sub>2</sub> was adsorbed to the two adjacent Fe sites with the binuclear*  
264 *configuration and was thus activated.*

265 *During the revision, Figure R5 was modified as the new Supplementary Figure S13,*  
266 *Figure R6 was added as a new Figure 3c in the revised manuscript and the*  
267 *corresponding discussion was added on page 8 in the revised manuscript as follows.*

268 *“Furthermore, we simulated the infrared spectra of Fe/MnO<sub>2</sub> and Fe/MnO<sub>2</sub> with*  
269 *O<sub>2</sub> adsorption by DFT calculation (Figure 3c). In the simulated infrared spectrum*  
270 *of Fe/MnO<sub>2</sub> with O<sub>2</sub> adsorption, a new characteristic peak appeared near 1200 cm<sup>-1</sup>,*  
271 *which was consistent with the experiment results.”*

272

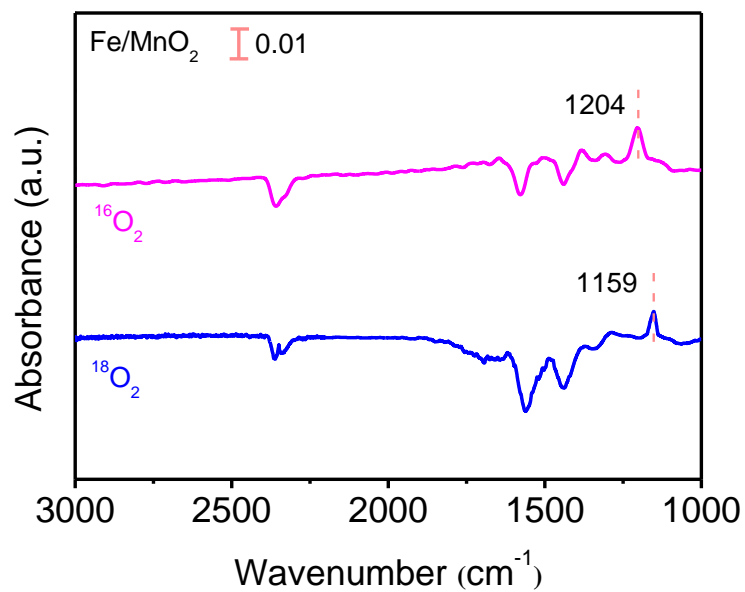

273

274 Figure R3. In situ DRIFTS of <sup>18</sup>O<sub>2</sub> isotope over Fe/MnO<sub>2</sub> in the out-line system.

275

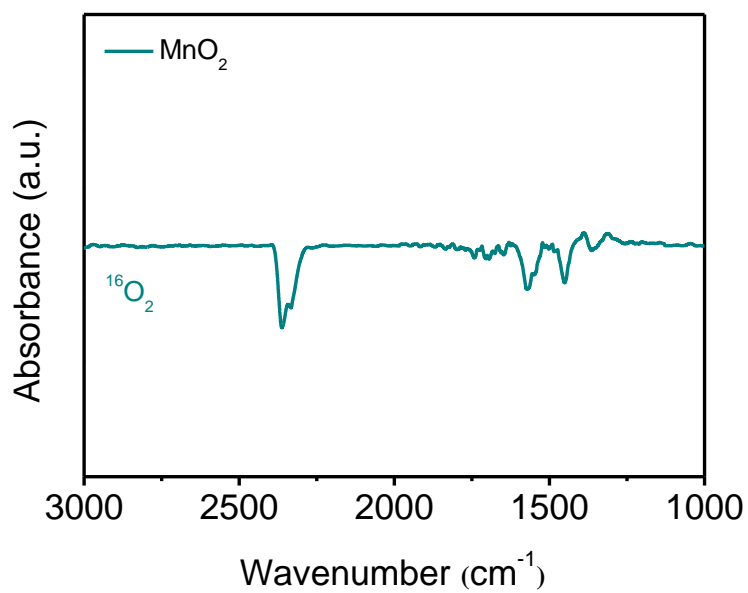

276

277 Figure R4. In situ DRIFTS of <sup>16</sup>O<sub>2</sub> over MnO<sub>2</sub> in the out-line system.

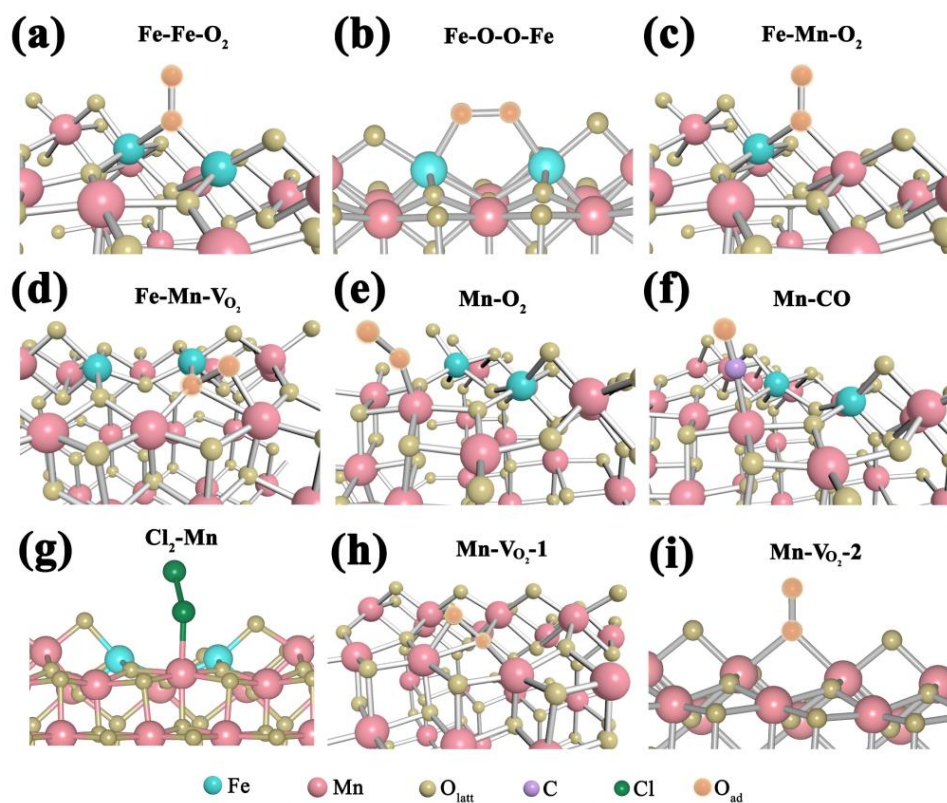

| Configuration          | a     | b     | c     | d     | e     | f     | g     | h     | i     |
|------------------------|-------|-------|-------|-------|-------|-------|-------|-------|-------|
| Adsorption Energy (eV) | -2.00 | -1.47 | -1.82 | -0.83 | -1.66 | -2.15 | -3.11 | -2.39 | -1.69 |

278

279 Figure R5. The stable configurations of (a-e) O<sub>2</sub>, (f) CO and (g) Cl<sub>2</sub> adsorbed at the  
 280 different sites of Fe/MnO<sub>2</sub> surface, and O<sub>2</sub> adsorbed in (h) the oxygen vacancy or (i)  
 281 bi-manganese sites of MnO<sub>2</sub>. The corresponding adsorption energy with zero-point  
 282 energy correction is listed in the table of the picture.

283



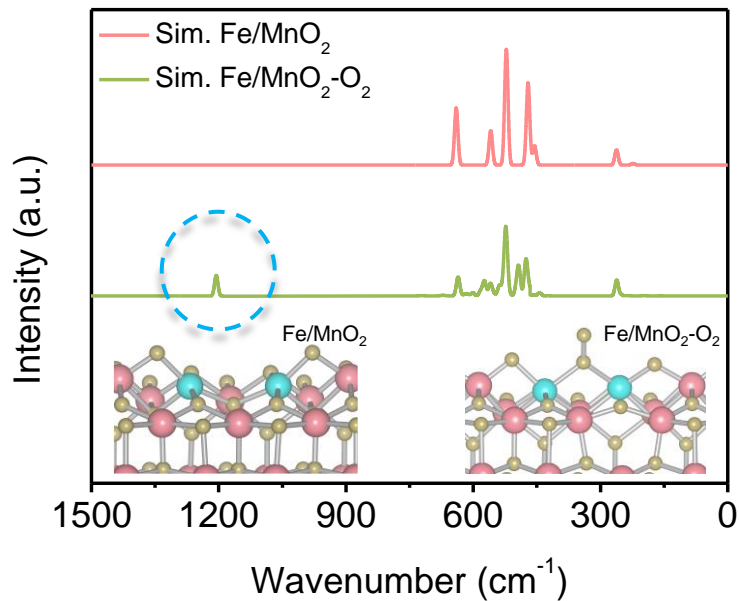

284

285 Figure R6. Simulated infrared spectra of Fe/MnO<sub>2</sub> and Fe/MnO<sub>2</sub> with O<sub>2</sub> adsorption.

286 The bottom of the picture was the structure of the different species.

287

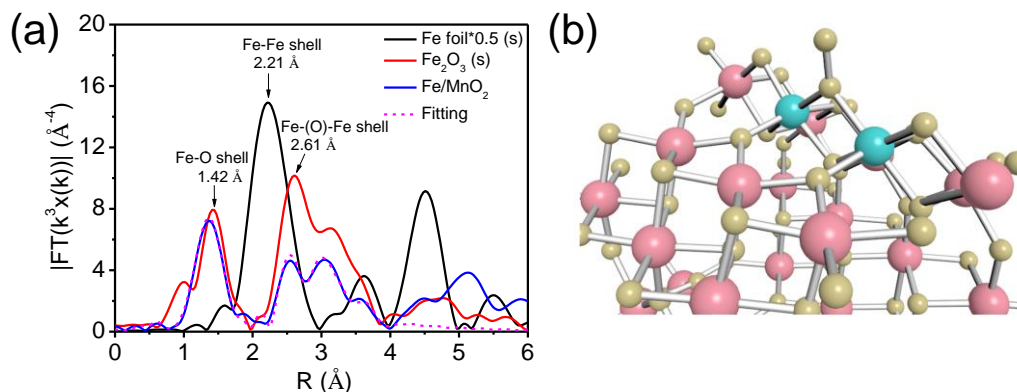

288

289 Figure R7. (a) Fourier-transformed K-edge EXAFS spectra in R-space of Fe (without  
290 phase correction) and the fitting of Fe/MnO<sub>2</sub> structure in (b).

291

292 5. The 1204 cm<sup>-1</sup> band in Fig. 2f is supposed to be relating to the Fe(O=O)Fe species.

293 However, the authors should tell the readers that such a decrease in the wavenumber

294 is indeed from the isotopic effect for the Fe(O=O)Fe species. The Fe(O=O)Fe species

295 is non-polar, how could the O-O vibrational mode appear in IR? DFT could help

296 calculate all vibrational modes of the proposed Fe(O=O)Fe species. Such

297 calculations should be included.

298 Response: We thank the reviewer for this valuable advice. The simulated infrared  
 299 spectra (Figure R6) confirmed that the 1204  $\text{cm}^{-1}$  band in Figure 2f was related to the  
 300  $\text{Fe}(\text{O}=\text{O})\text{Fe}$  species. Previously studies revealed that the decrease in the wavenumber  
 301 of in-situ DRIFTS with  $^{18}\text{O}_2$  was arisen from the isotopic effect [please see *Nat. Catal.*  
 302 *2*, 916-924 (2019)], which was added on page 7 in the revised manuscript as follows.  
 303 *“When  $^{16}\text{O}_2$  was replaced by  $^{18}\text{O}_2$ , this characteristic peak shifted from 1204  $\text{cm}^{-1}$  to*  
 304 *the lower wavenumber of 1159  $\text{cm}^{-1}$  due to the isotopic effect (Figure 3a), indicating*  
 305 *that this peak was closely related to the new active oxygen species generated via  $\text{O}_2$*   
 306 *activation on  $\text{Fe}/\text{MnO}_2$  [22].”*

307 Bader charge calculation results revealed the two oxygen atoms had different  
 308 charges (-0.37 and -0.06) after an oxygen molecule was adsorbed on the two adjacent  
 309 Fe sites with end-on mode (Figure R8). The different charges constantly changed the  
 310 dipole moment of  $\text{O}_2$  in the vibration process, accounting for the infrared  
 311 characteristic absorption peak of  $\text{Fe}(\text{O}=\text{O})\text{Fe}$ . During the revision, we simulated  
 312 infrared spectra of  $\text{Fe}/\text{MnO}_2$  and  $\text{Fe}/\text{MnO}_2$  with  $\text{O}_2$  adsorption by DFT calculation. As  
 313 expected, a new characteristic peak appeared near 1200  $\text{cm}^{-1}$  for  $\text{Fe}/\text{MnO}_2$  with  $\text{O}_2$   
 314 adsorption (Figure R6), consistent with the experimental results.

315

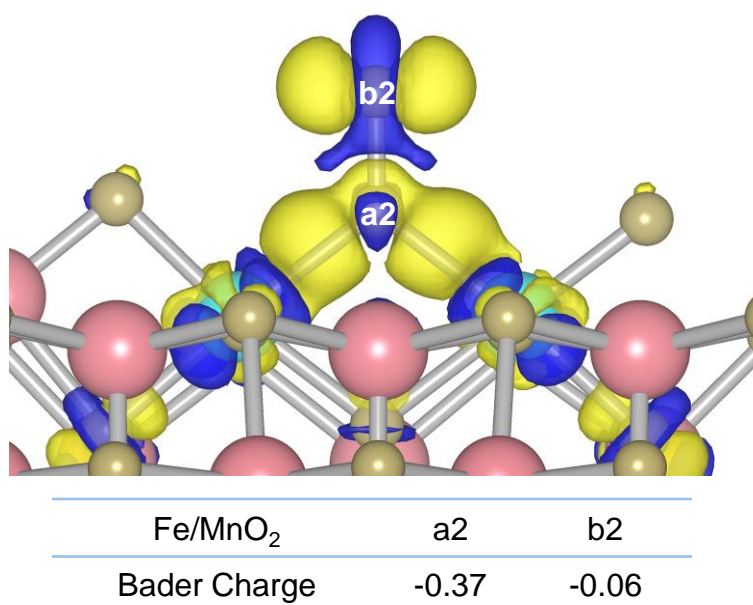

316

317 Figure R8. The difference charge density of  $\text{O}_2$  adsorbed on  $\text{Fe}/\text{MnO}_2$ . Different

318 oxygen atoms from adsorbed oxygen species were labeled as a and b, and  
319 corresponding Bader charge was recorded in the bottom of charge density map. The  
320 charge density of yellow and blue represents the concentrated and scarce electrostatic  
321 potential scale respectively.

322

323 *6. An additional question about the blank experiment on the structure of the Fe/MnO<sub>2</sub>*  
324 *catalyst in Figure 1f: is there any oxygen molecule between the iron atoms at the*  
325 *binuclear site before O<sub>2</sub> adsorption takes place? According to the analysis in the*  
326 *manuscript, the active site should be Fe-(O<sub>v</sub>)-Fe, then how can the O<sub>2</sub> molecule be*  
327 *adsorbed to form Fe(O=O)Fe? The EXAFS result does show the existence of Fe-O*  
328 *and Fe-(O)-Fe. Normally, Mn-O-Mn should be stable in the MnO<sub>2</sub> structure.*  
329 *Therefore, Fe-O-Fe should be more stable than Fe-(O<sub>v</sub>)-Fe and Fe(O=O)Fe, then*  
330 *why is Fe-O-Fe non-existent in Fe/MnO<sub>2</sub>?*

331 *Response: We thank the reviewer for the valuable comments. We would like to*  
332 *answer the comments as follows.*

333 (1) The DFT calculation results demonstrated that O<sub>2</sub> was adsorbed on the two  
334 adjacent Fe sites (-2.00 eV) with the highest adsorption energy, indicating that the  
335 Fe(O=O)Fe was the most favorable adsorption configuration (Figure R5a). Regarding  
336 that the catalyst after hydrothermal reaction was calcined in air atmosphere during the  
337 preparation process of Fe/MnO<sub>2</sub>, we believe that oxygen molecules might be adsorbed  
338 between the two adjacent Fe sites before O<sub>2</sub> adsorption.

339 (2) The formation of Fe(O=O)Fe might be related to the synthesis method of the  
340 catalyst. To verify this assumption, we conducted ATR measurements of Fe/MnO<sub>2</sub>  
341 synthesized at different temperatures (Figure R9). The characteristic peaks of ferric  
342 oxalate (757, 812 and 1255 cm<sup>-1</sup>) appeared in the catalysts synthesized at 80 °C,  
343 which were weakened along with the further increase of the synthesis temperatures. In  
344 combination with Figure S25 and S26, the iron species existed in the precursor  
345 solution with the form of iron oxalate complex. With the increase of hydrothermal  
346 temperature, [MnO<sub>6</sub>] structural units appeared in priority, resulting in the formation of  
347 the periodic structure of MnO<sub>2</sub>. Then, the ferric oxalate was gradually decomposed

348 into CO<sub>2</sub>, leaving Fe atoms on the surface of MnO<sub>2</sub>. Regarding that oxalate was  
349 excessive and the reaction was in a reductive environment [please see *J. Hazard.*  
350 *Mater.*, 262, 701-708 (2013) and *Environ. Sci. Technol.*, 53, 6444-6453 (2019)],  
351 oxygen vacancies were more easily generated on the catalyst surface. Therefore, we  
352 believe that the two adjacent sites possessed the Fe-(O<sub>v</sub>)-Fe configuration and thus  
353 formed Fe(O=O)Fe species after calcination in the air atmosphere,.

354 (3) We also simulated the infrared spectrum of Fe/MnO<sub>2</sub> with Fe-O-Fe structure, and  
355 did not find the appearance of characteristic peak near 1200 cm<sup>-1</sup> (Figure R10). Thus,  
356 more active Fe(O=O)Fe can be obtained through the hydrothermal method of  
357 oxalate-assisted chelation coordination, even though Fe-O-Fe is more stable.

358 *During the revision, Figure R9 was added as new Supplementary Figure S24.*

359

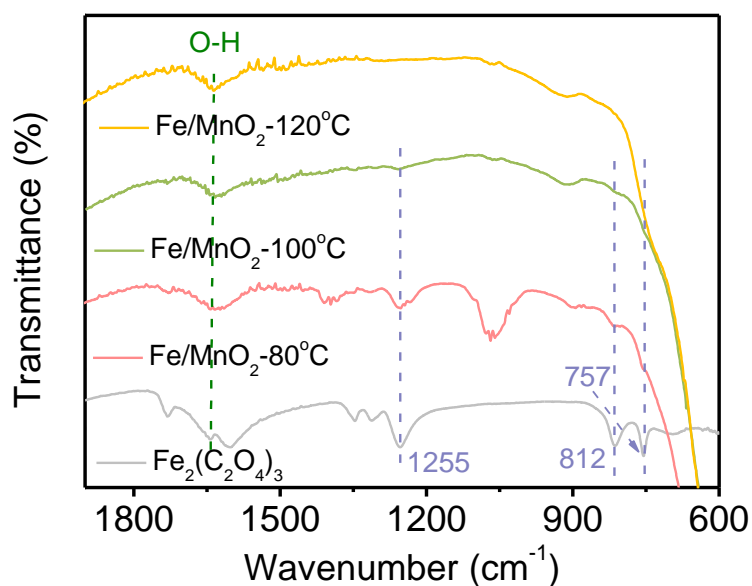

360

361 Figure R9. ATR spectra of standard Fe<sub>2</sub>(C<sub>2</sub>O<sub>4</sub>)<sub>3</sub> and Fe/MnO<sub>2</sub> synthesized from at  
362 different temperatures.

363

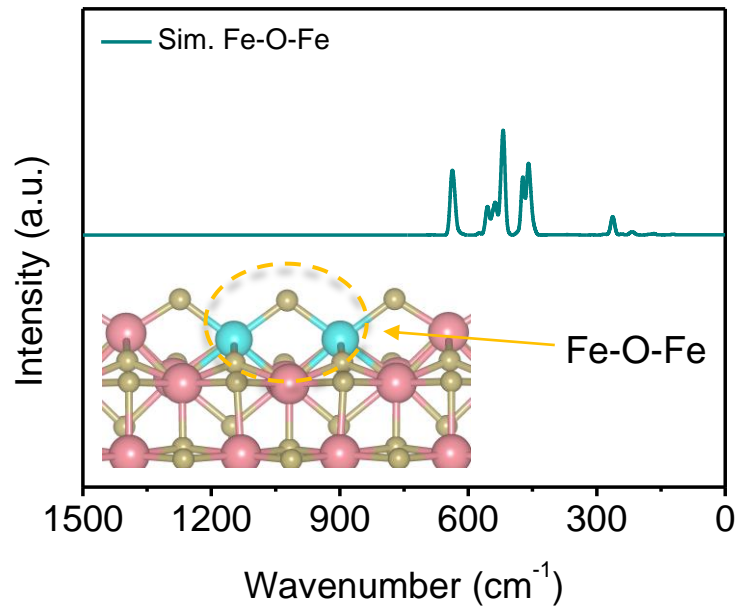

364

365 Figure R10. Simulated infrared spectrum of Fe/MnO<sub>2</sub> with Fe-O-Fe structure. The

366 bottom of the picture was the structure of the different species

367 **Reviewer #2 (Remarks to the Author):**

368 *The authors claimed that they demonstrated that dual adjacent single Fe atoms*  
369 *anchored on MnO<sub>2</sub> can assemble into a binuclear site, which activates molecular*  
370 *oxygen to form an active intermediate species Fe(O=O)Fe for highly efficient CO*  
371 *oxidation. It was concluded that binuclear Fe sites exhibited a stronger O<sub>2</sub> activation*  
372 *performance than the conventional surface oxygen vacancy activation sites.*

373 *However, the data provided seems not enough to support their claims. The following*  
374 *is the reasons why I consider it is inadequate, including questions and comments. I*  
375 *hope this will help improve the quality of this author's work and contribute further*  
376 *understanding the physics behind this seminal catalytic reaction.*

377 Thank you for your summary. We appreciate your efforts in reviewing our manuscript  
378 and have revised the manuscript accordingly to support our conclusions as strongly as  
379 possible.

380

381 *In Fig.1a, TEM with atomic resolution are shown and Fe and Mn atoms were*  
382 *identified by line profile in Fig. 3b. I assume that they were distinguished by the*  
383 *intensity differences of the bright spots from the line profile. If so, I suggest the*  
384 *authors to show TEM for MnO<sub>2</sub> to confirm that there is no intensity differences among*  
385 *the bright spots and prove intensity difference is inherently from Fe and Mn in*  
386 *Fe/MnO<sub>2</sub>. I can see some bright spots on the surface of pure MnO<sub>2</sub> in HRTEM of Fig.*  
387 *3a of the following literature, but their intensities are different.*

388 *J. Gao et al./Journal of Catalysis 341 (2016) 82-90.*

389 *I also suggest showing line profile for longer distance and calculating the Fe*  
390 *coverage to see if it is consistent to the amount of introduced Fe. In some areas, three*  
391 *or more bright spots appear to be lined up.*

392 Response: We thank the reviewer for this constructive advice and would like to reply  
393 the comments as follows.

394 (1) We distinguished Mn and Fe atoms by the intensity difference and the distance  
395 between the atoms from HAADF-STEM, because the intensity of Fe is stronger than  
396 that of Mn. Meanwhile, DFT calculation results revealed the distance between Fe-Fe

397 was 3.1 Å, longer than that 2.7 Å of Fe-Mn. Referring to the remarkable article [*J.*  
 398 *Catal.*, 341, 82-90 (2016)], we performed STEM test on pure MnO<sub>2</sub> (Figure R11). The  
 399 results revealed that the intensity and the distance of 2.9 Å between the atoms were in  
 400 accordance with the theoretical calculation model of MnO<sub>2</sub>.

401 (2) Based on the strength of atoms and the distance between adjacent atoms, we  
 402 statistically analyzed the STEM spectra of 300 atoms in three regions on the surface  
 403 of three different Fe/MnO<sub>2</sub> catalysts (0.1%, 0.25% and 0.5% Fe/MnO<sub>2</sub>) in Figure R1  
 404 and Table R1. For 0.25% Fe/MnO<sub>2</sub>, 89 of 300 atoms on the surface were counted as  
 405 Fe atoms, and others as Mn atoms. According to the model structure of Fe/MnO<sub>2</sub>  
 406 (Figure R12), the height of the monolayer atoms is 2.63 Å (h). The TEM results  
 407 displayed that the thickness of the nanorods was about 19.7 nm (H), consistent with  
 408 the literature [*ACS Catal.* 8, 3435-3446 (2018)]. On the basis of calculation formulas  
 409 (1-5), the mass fraction of Fe was 0.46%, very close to the ICP test results (0.3%), if  
 410 the impurities adsorbed on the surface were ignored. These results have demonstrated  
 411 that Fe is distributed as a single atom on the surface of Fe/MnO<sub>2</sub>, and it is feasible to  
 412 distinguish Mn and Fe atoms according to the differences in strength and distance.

$$413 \quad m_{\text{Fe}} = \frac{n_{\text{Fe}} \times M_{\text{Fe}}}{N_{\text{A}}} \quad (1)$$

$$414 \quad m_{\text{Mn}} = \frac{n_{\text{Mn}} \times M_{\text{Mn}}}{N_{\text{A}}} \quad (2)$$

$$415 \quad m_{\text{O}} = \frac{2 \times (n_{\text{Mn}} + n_{\text{Fe}}) \times M_{\text{O}}}{N_{\text{A}}} \quad (3)$$

$$416 \quad N = \frac{H}{h} \quad (4)$$

$$417 \quad W_{\text{Fe}} = \frac{2 \times m_{\text{Fe}}}{2 \times (m_{\text{Fe}} + m_{\text{Mn}} + m_{\text{O}}) + 300 \times m_{\text{MnO}_2} \times N} \quad (5)$$

418 Where m represents the mass of different element; N is the number of atoms; M is the  
 419 relative atomic mass; N<sub>A</sub> is the Avogadro constant; H is the thickness of catalyst,  
 420 which is counted by TEM test results. h represents the height of single-layer MnO<sub>2</sub>,  
 421 which comes from the structural optimization model; N is the number of layers; W<sub>Fe</sub>

422 is the mass fraction of Fe;

423 *During the revision, Figure R11 and R12 were added as the new Supplementary*  
424 *Figure S14 and S17 respectively. We also cited this relevant literature [J. Catal., 341*  
425 *82-90 (2016)] as Ref. 23 and added the corresponding discussion on page 18 in the*  
426 *revised Supporting Information as follows. “Based on the strength of atoms and the*  
427 *distance between adjacent atoms, we statistically analyzed the STEM spectra of 300*  
428 *atoms in three regions on the surface of three different Fe/MnO<sub>2</sub> catalysts (0.1%,*  
429 *0.25% and 0.5% Fe/MnO<sub>2</sub>) in Figure S16 and Table R2. For 0.25% Fe/MnO<sub>2</sub>, 89 of*  
430 *300 atoms on the surface were counted as Fe atoms, and others as Mn atoms.*  
431 *According to the model structure of Fe/MnO<sub>2</sub> (Figure S17), the height of the*  
432 *monolayer atoms is 2.63 Å (h). The TEM results displayed that the thickness of the*  
433 *nanorods was about 19.7 nm (H), consistent with the literature [4]. On the basis of*  
434 *calculation formulas (5-9), the mass fraction of Fe was 0.46%, very close to the ICP*  
435 *test results (0.3%), if the impurities adsorbed on the surface were ignored. These*  
436 *results have demonstrated that Fe is distributed as a single atom on the surface of*  
437 *Fe/MnO<sub>2</sub>, and it is feasible to distinguish Mn and Fe atoms according to the*  
438 *differences in strength and distance.”*

439



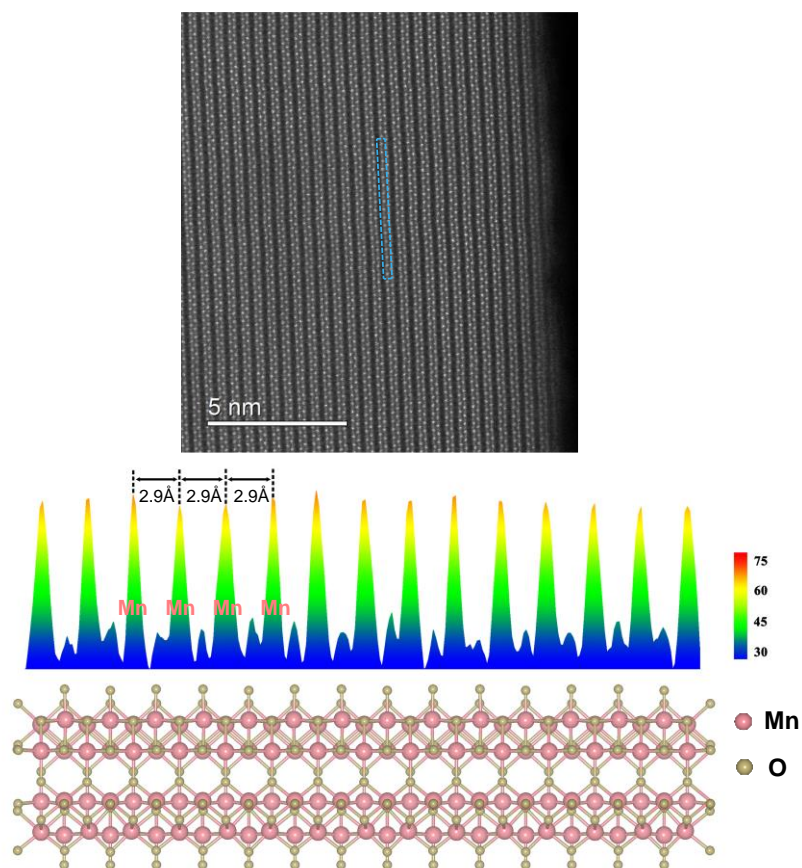

440  
 441 Figure R11. STEM image of MnO<sub>2</sub> (top), intensity surface plot from blue dashed  
 442 rectangle (middle) and the corresponding structural model (bottom).  
 443

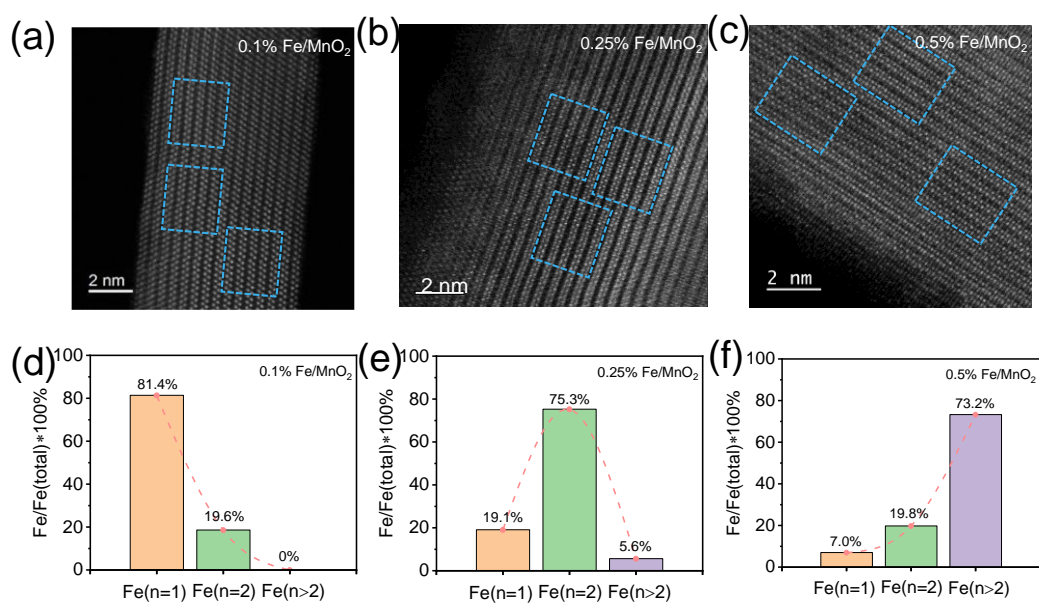

444  
 445 Figure R1. (a-c) STEM images of different Fe/MnO<sub>2</sub> catalysts. The atoms surrounded  
 446 by the blue dotted box will be used for site statistics. (d-f) Statistical results of the

447 number of Fe sites corresponding to different catalysts.

448

449 Table R1. Statistical results of different Fe sites and Mn contents of the three catalysts

450 from Figure R1.

|                           | Fe(total) | Fe(n=1) | Fe(n=2) | Fe(n>2) | Mn  |
|---------------------------|-----------|---------|---------|---------|-----|
| 0.1% Fe/MnO <sub>2</sub>  | 43        | 35      | 8       | 0       | 257 |
| 0.25% Fe/MnO <sub>2</sub> | 89        | 17      | 67      | 5       | 211 |
| 0.5% Fe/MnO <sub>2</sub>  | 172       | 12      | 34      | 126     | 128 |

451

452 n represents the number of adjacent Fe atoms.

453

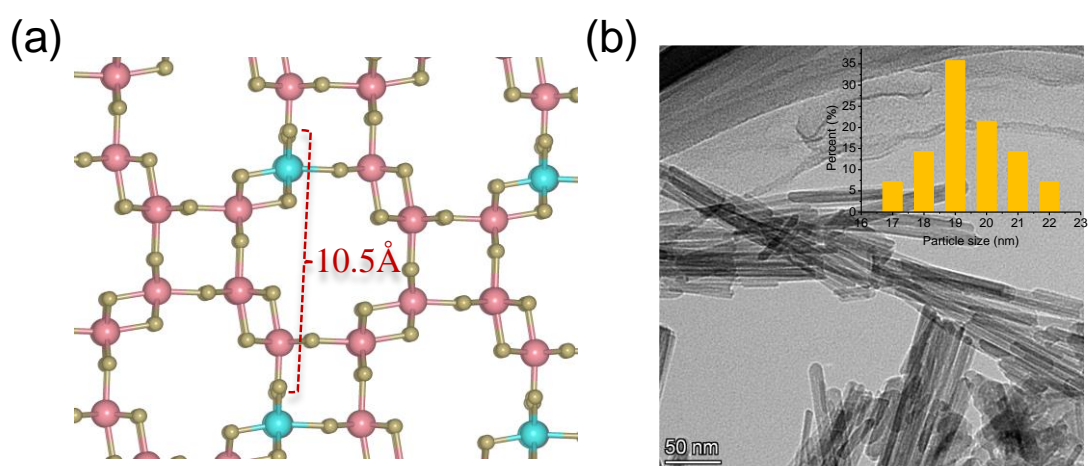

454

455 Figure R12. (a) The structural model and (b) TEM spectrum of Fe/MnO<sub>2</sub>. Particle size  
456 was counted according to TEM result.

457

458 XAFS was taken for Fe foil (metallic Fe), Fe<sub>2</sub>O<sub>3</sub> (Fe<sup>3+</sup>) and Fe/MnO<sub>2</sub> and spectrum of  
459 Fe/MnO<sub>2</sub> is almost the same to that of Fe<sub>2</sub>O<sub>3</sub>. I suggest authors to discuss oxidation  
460 state of Fe based on the result of XPS of Fe on Fe/MnO<sub>2</sub> with literatures and Bader  
461 charge.

462 Fourier-transformed k-edge EXAFS for Fe<sub>2</sub>O<sub>3</sub> and Fe/MnO<sub>2</sub> are quite similar. The  
463 possibility of formation Fe<sub>2</sub>O<sub>3</sub> was excluded by comparing the Morlet wavelet  
464 transform in Supplementary Fig.3 but the results show no significant difference. The  
465 k<sup>3</sup>-weighted EXAFS can be judged to check the quality of the measured spectra but  
466 not shown. It may not be possible to prove that Fe<sub>2</sub>O<sub>3</sub> is not formed only from the

467 *results of this XAFS analysis.*

468 Response: Thank you for your kind comments and helpful suggestions. We used  
469 ammonium oxalate and iron nitrate to synthesize  $\text{Fe}_2\text{O}_3$ , and measured the Fe 3d XPS  
470 spectra of pure  $\text{Fe}_2\text{O}_3$  and  $\text{Fe/MnO}_2$  (Figure R13). It was found that the characteristic  
471 peak of  $\text{Fe/MnO}_2$  had lower binding energy (710.6 eV) than that (711.4 eV) of  $\text{Fe}_2\text{O}_3$ .  
472 Meanwhile, Bader charge calculation results revealed that Fe on  $\text{Fe/MnO}_2$  possessed  
473 more electrons than that of  $\text{Fe}_2\text{O}_3$ , consistent with the results of XANES absorption  
474 (Figure R14). Furthermore, the statistical results of Fe atoms distributed on the  
475 surface of 0.25%  $\text{Fe/MnO}_2$  from STEM spectrum (0.46%) matched with the result  
476 from ICP test (0.3%). These results ruled out the formation of  $\text{Fe}_2\text{O}_3$  in the  $\text{Fe/MnO}_2$ .  
477 k3-weighted EXAFS was shown in Fig. R15 (Figure S3 of revised Supporting  
478 Information).

479 *During the revision, Figure R13 and R15 were added as new Figure S6 and Figure S3*  
480 *in the revised Supporting Information respectively, and more discussion was added on*  
481 *page 5 in the manuscript as follows. “We also compared the Fe 3d XPS spectra of*  
482  *$\text{Fe}_2\text{O}_3$  and  $\text{Fe/MnO}_2$  (Figure S6), and found that the characteristic peak of*  
483  *$\text{Fe/MnO}_2$  had lower binding energy (710.6 eV) than that (711.4 eV) of  $\text{Fe}_2\text{O}_3$ .*  
484 *Meanwhile, Bader charge calculation results revealed that Fe on  $\text{Fe/MnO}_2$*   
485 *possessed more electrons than that of  $\text{Fe}_2\text{O}_3$ , consistent with the results of XANES*  
486 *absorption (Figure 1d).”*

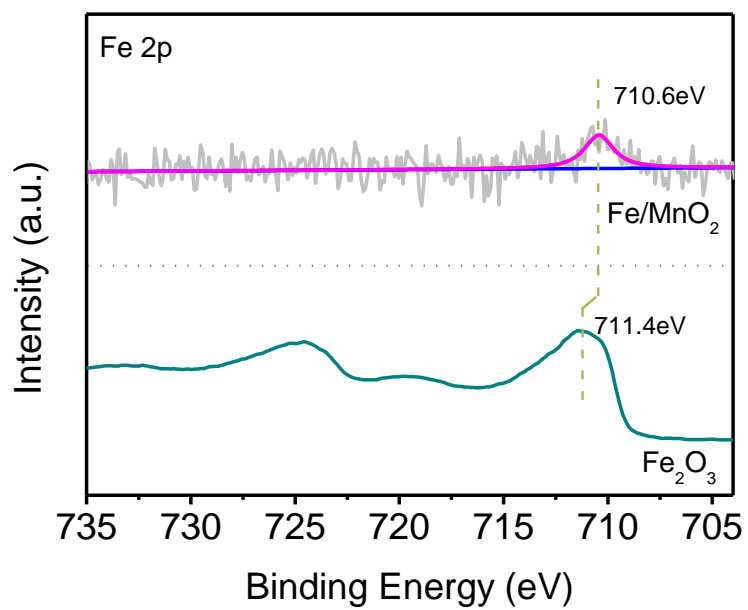

487

488 Figure R13. XPS spectrum of Fe2p in Fe/MnO<sub>2</sub> and Fe<sub>2</sub>O<sub>3</sub> sample.

489

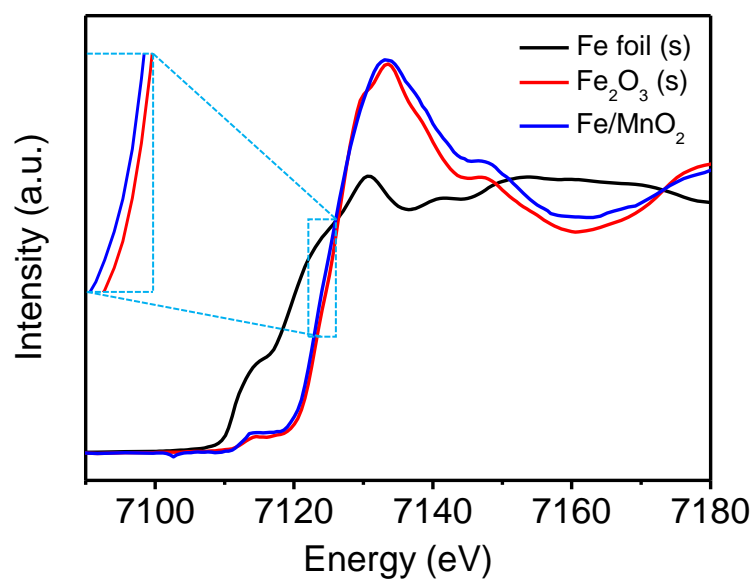

490

491 Figure R14. Normalized XANES spectra of Fe.

492

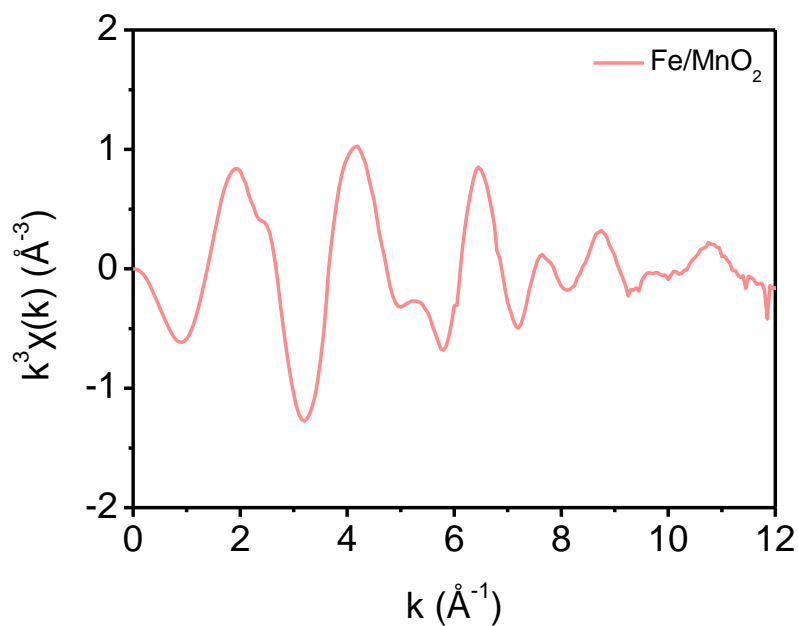

493

494 Figure R15. k3-weighted EXAFS spectrum of Fe/MnO<sub>2</sub> sample.

495

496 *Peaks in Fig 3a is too small to see.*

497 *Response: Thanks for the suggestions. We enlarged the peaks in Figure R3 for better*  
 498 *view (Figure 3a in the revised manuscript).*

499

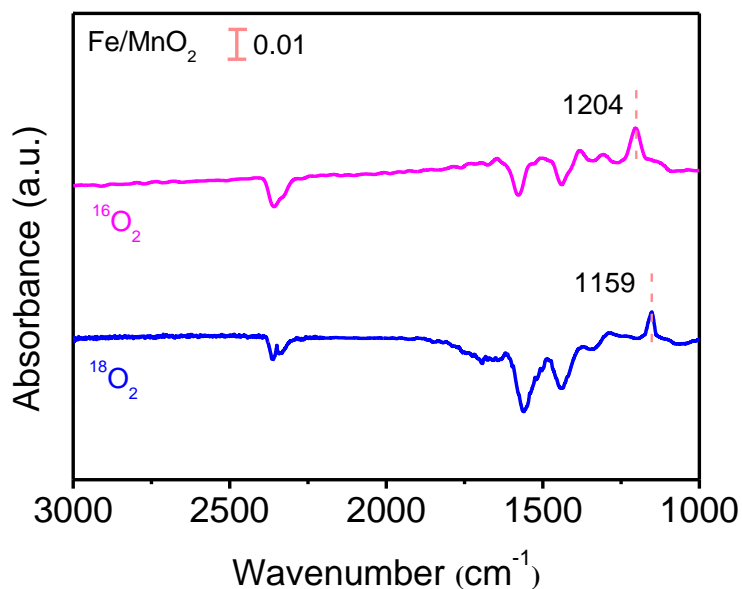

500

501 Figure R3. In situ DRIFTS of <sup>18</sup>O<sub>2</sub> isotope over Fe/MnO<sub>2</sub> in the out-line system.

502

503 *How can you exclude the possibility of MvK on bare MnO<sub>2</sub> surface of Fe/MnO<sub>2</sub>? Is*

504 *there any evidence that MvK is hindered by Fe atoms?*

505 *The Fe(O=O)Fe was suggested to the preferentially adsorbed configuration of O<sub>2</sub>*  
506 *since the adsorption energy is high, however, in the calculation in Supplementary*  
507 *Fig .10, Mn(O=O)Mn was not calculated.*

508 *Response: We thank the reviewer for these valuable questions and would like to reply*  
509 *the comments as follows.*

510 (1) We adopted DFT calculation to check why the MvK mechanism on MnO<sub>2</sub> surface  
511 was hindered by Fe atoms. First of all, O<sub>2</sub> located at the unsaturated Fe sites possessed  
512 a higher energy (-2.00 eV in Figure R5a) than that at the oxygen vacancy (-0.83 eV in  
513 Figure R5d). Then, the calculation results of the transition state revealed that the  
514 energy (0.19 eV) for CO reacting with O<sub>2</sub> adsorbed on the two adjacent Fe sites was  
515 lower than that (0.37 eV) of O<sub>2</sub> adsorbed in the oxygen vacancy (Figure R16).  
516 Therefore, the MvK mechanism on bare MnO<sub>2</sub> was inhibited by the high energy  
517 demand.

518 (2) In accordance with the reviewer's suggestion, we calculated the oxygen adsorption  
519 energy (-1.69 eV) of Mn(O=O)Mn configuration (Figure R5i), which was lower than  
520 that (-2.00 eV) of Fe(O=O)Fe.

521 *During the revision, Figure R16 was added as the new Supplementary Figure S29 and*  
522 *the corresponding discussion was added on page 13 in the revised manuscript as*  
523 *follows. "Furthermore, we also calculated the energy of CO reacting with O<sub>2</sub> on*  
524 *different sites. The calculation results of the transition state revealed that the*  
525 *energy (0.19 eV) for CO reacting with O<sub>2</sub> adsorbed on the adjacent Fe sites was*  
526 *lower than that (0.37 eV) of O<sub>2</sub> adsorbed on the V<sub>o</sub> referring to Figure S29.*  
527 *Therefore, the MvK mechanism on bare MnO<sub>2</sub> could be inhibited by the high*  
528 *energy demand."*

529



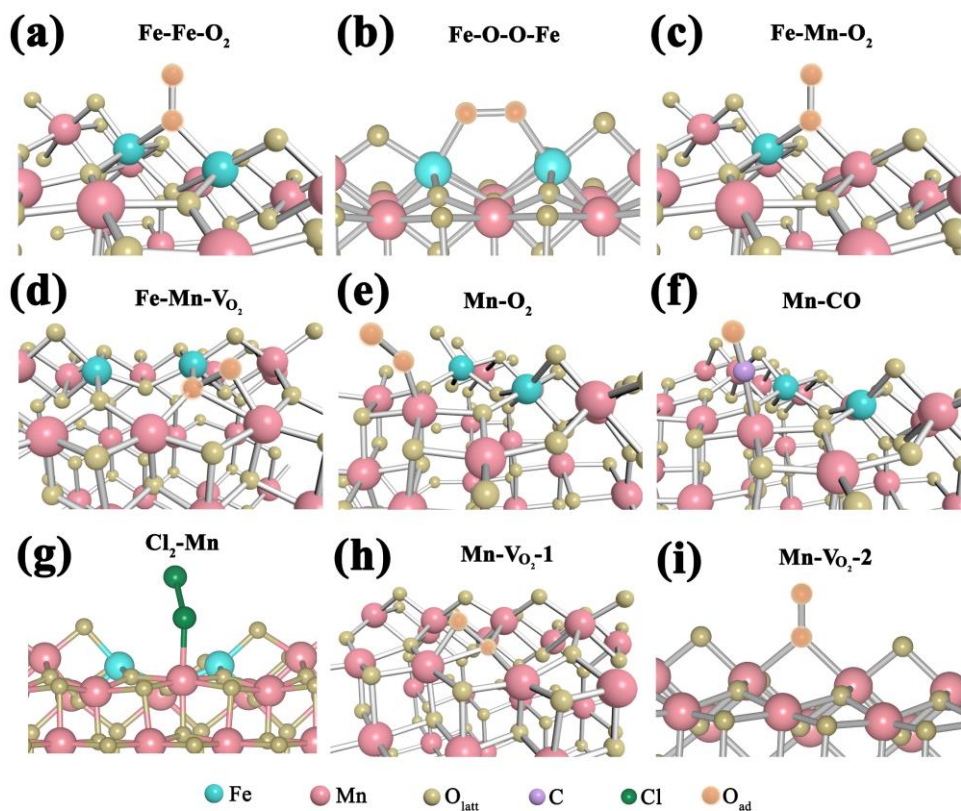

| Configuration          | a     | b     | c     | d     | e     | f     | g     | h     | i     |
|------------------------|-------|-------|-------|-------|-------|-------|-------|-------|-------|
| Adsorption Energy (eV) | -2.00 | -1.47 | -1.82 | -0.83 | -1.66 | -2.15 | -3.11 | -2.39 | -1.69 |

530

531 Figure R5. The stable configurations of (a-e) O<sub>2</sub>, (f) CO and (g) Cl<sub>2</sub> adsorbed at the  
 532 different sites of Fe/MnO<sub>2</sub> surface, and O<sub>2</sub> adsorbed in (h) the oxygen vacancy or (i)  
 533 bi-manganese sites of MnO<sub>2</sub>. The corresponding adsorption energy with zero-point  
 534 energy correction is listed in the table of the picture.

535

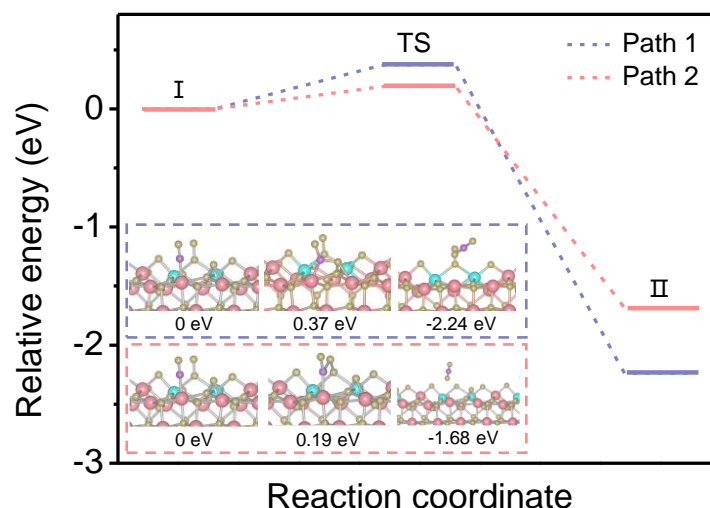

536

537 Figure R16. Energy profiles of CO reacted through the different path in Fe/MnO<sub>2</sub>. The  
 538 optimized structures of initial states (I), transition states (TS) and final states (II) are  
 539 listed in the dotted box, and the relative energy is recorded below the corresponding  
 540 structure.

541

542 *What is the meaning of “molecular oxygen activation” and “activation behavior of*  
 543 *oxygen” in line 32 and 184? Is it mentioning low dissociation energy of oxygen*  
 544 *molecules? I suggest the authors define the term and share the physical image clearly*  
 545 *before it is used for the readership of this multidisciplinary journal.*

546 **Response:** We appreciate the reviewer for these kind suggestions. In the original  
 547 manuscript, both molecular oxygen activation and activation behavior of oxygen  
 548 corresponded to weakening O=O double bond, reducing dissociation energy of  
 549 oxygen molecule and facilitating oxygen to participate in the reaction process more  
 550 easily. The diagram of molecular oxygen activation was shown in Figure R17. We  
 551 added more description for better understanding of this term.

552 *During the revision, Figure R17 was added as the new Supplementary Figure S1 and*  
 553 *the corresponding discussion about the term of molecular oxygen activation was*  
 554 *added on page 2 in the revised manuscript and page 2 in the Supporting Information*  
 555 *as follows. “Molecular oxygen activation is a continuous process of adsorption and*  
 556 *dissociation of O<sub>2</sub> on the catalyst surface. The process relies on the transfer of*



557 *electrons from the surface of catalyst to the O<sub>2</sub> to weaken the oxygen-oxygen double*  
558 *bond. Meanwhile, the structure of the adsorption site on the catalyst surface plays*  
559 *an important role in the activation of O<sub>2</sub>. [Chem. Rev., 118, 2816-2862 (2018); Nat*  
560 *Commun. 12, 2741 (2021)]”*

561

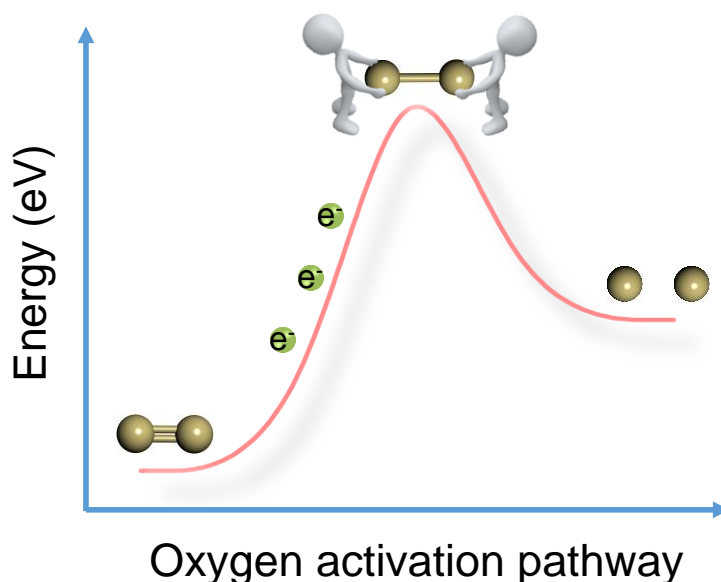

562

563 Figure R17. Diagram of molecular oxygen activation.

564

565 *In line 24, in introductory part, author described that high concentration of oxygen in*  
566 *air or high temperature will inevitably lead to the refilling of oxygen vacancy by*  
567 *referencing ORR study and not CO oxidation. I don't think this is appropriate citation.*

568 *There are many studies for oxygen vacancy involved CO oxidation studies. I suggest*  
569 *authors to present discussions based on more relevant literatures. For the same*  
570 *reasons, reference 1 to 3 seems inappropriate (they are electrochemical ORR studies*  
571 *and there should be more relevant references).*

572 *Response: We thank the reviewer for the valuable suggestion. We deleted references*  
573 *1-4 from the original manuscript and replaced them with new references 7-9 [J. Am.*  
574 *Chem. Soc. 140, 4580-4587 (2018); ACS Catal. 9, 9751-9763 (2019); ChemCatChem*  
575 *9, 1119-1127 (2017)]. These references offer us deeper atomic-level insights into the*  
576 *relationship between oxygen vacancy and molecular oxygen activation, promoting*  
577 *CO oxidation.*

578

579 *Injection of Cl<sub>2</sub> was performed. Is it necessarily be Cl<sub>2</sub>? Why Cl<sub>2</sub>? I recommend*  
580 *authors to add explanation why this way is good for investigating/identifying the CO*  
581 *oxidation mechanism, probably with citing some articles.*

582 *Response: We thank the reviewer for these valuable comments. Chlorine is well*  
583 *known for its high electron density and strong adsorption properties [J. Am. Chem.*  
584 *Soc., 2012, 134, 20160–20168]. Some literatures reported that chlorine was prone to*  
585 *form strong adsorption with metal sites on the catalyst surface during the catalytic*  
586 *reaction, leading to catalyst deactivation [please see Chem. Rev., 2019, 119,*  
587 *4471–4568; Environ. Sci. Technol., 2021, 55, 4007–4016]. Even after oxygen*  
588 *adsorption, Cl<sub>2</sub> could cover the surface of MnO<sub>2</sub> and firmly occupied the adsorption*  
589 *sites of CO. Furthermore, Cl<sub>2</sub> has a stronger adsorption capacity at unsaturated Mn*  
590 *sites than CO (-3.11 eV for Cl<sub>2</sub> versus -2.15 eV for CO), accounting for the design*  
591 *idea of the experiment. Therefore, we used Cl<sub>2</sub> to study the reaction mechanism in this*  
592 *study.*

593 *During the revision, we cited the related works as Refs. 26-28 and added more*  
594 *discussion on page 22 in the Supporting Information as follows. “Chlorine is well*  
595 *known for its high electron density and strong adsorption properties. Some*  
596 *literatures reported that chlorine was prone to form strong adsorption with metal*  
597 *sites on the catalyst surface during the catalytic reaction, leading to catalyst*  
598 *deactivation [5, 6]. Even after oxygen adsorption, Cl<sub>2</sub> could cover the surface of*  
599 *MnO<sub>2</sub> and firmly occupied the adsorption sites of CO. Furthermore, Cl<sub>2</sub> has a*  
600 *stronger adsorption capacity at unsaturated Mn sites than CO (-3.11 eV for Cl<sub>2</sub>*  
601 *versus -2.15 eV for CO), accounting for the design idea of the experiment.*  
602 *Therefore, we used Cl<sub>2</sub> to study the reaction mechanism in this study.”*

603

604 *In Supplementary Fig. 11 STEM images were shown but two of them are labeled the*  
605 *same. I recommend that you carefully check the other data to make sure there are no*  
606 *misrepresentations. Unit error was found in Line 108 and it should be 167 °C, not*  
607 *cm<sup>-1</sup>.*

608 Response: We are sorry for the typo error and carefully checked the manuscript  
609 thoroughly.

610

611 *In Supplementary Fig. 6, fitted light off curve for MnO<sub>2</sub> is awkward. Fitting needs to*  
612 *be performed based on the provided data and how you fit needs to be mentioned with*  
613 *reliability factor.*

614 Response: We appreciate the reviewer for the valuable comment. Figure R18  
615 corresponds to the activity spectrum after the normalization of specific surface area.  
616 The relation between  $C/(C_0 \cdot S)$  and  $T$  was used to plot the spectrum, rather than the  
617 result of kinetic curve fitting.

618

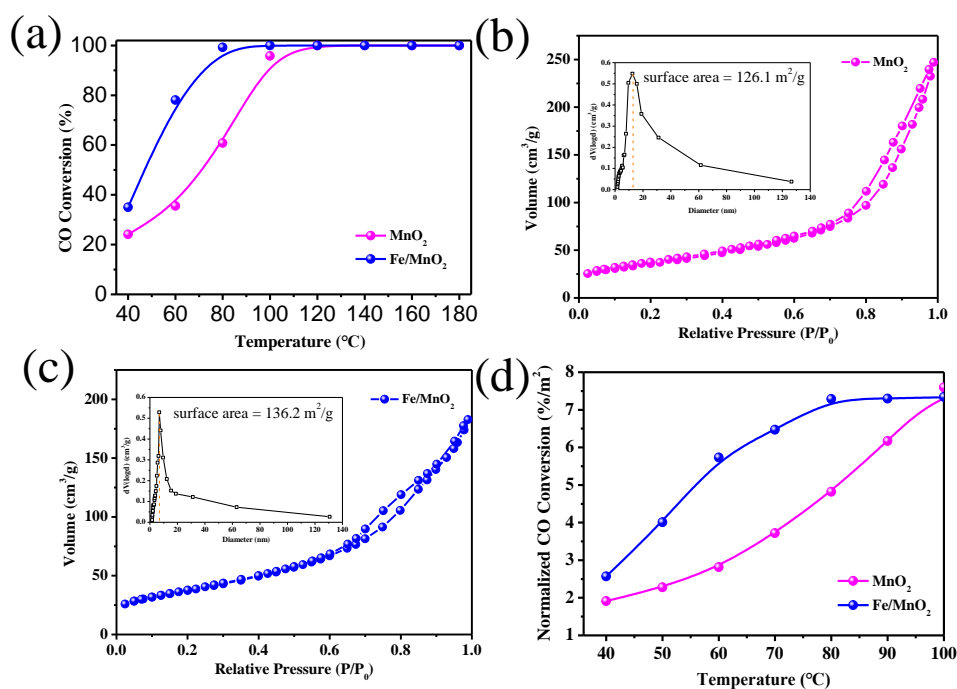

619

620 Figure R18. (a) Light-off curves of CO oxidation over Fe/MnO<sub>2</sub> and MnO<sub>2</sub>. Nitrogen  
621 adsorption/desorption isotherm plots of (b) MnO<sub>2</sub> and (c) Fe/MnO<sub>2</sub> (the insets of a  
622 and b showed the pore size distribution). (d) CO catalytic performance of the MnO<sub>2</sub>  
623 and Fe/MnO<sub>2</sub> normalized by BET surface area.

624

625 **Reviewer #3 (Remarks to the Author):**

626 *In this work, the authors report on a novel “single-atom” binuclear iron site*  
627 *embedded in a MnO<sub>2</sub> host lattice. Overall, this work is of very high quality and the*  
628 *findings are corroborated with theoretical study. This kind of earth-abundant material*  
629 *may well serve as the next generation of catalyst for a variety of chemical*  
630 *technologies and this type of fundamental study will be valuable in identifying paths*  
631 *forward in both improving and utilizing such structures. A few minor suggestions that*  
632 *might improve this manuscript:*

633 We thank the reviewer for the valuable and constructive comments and carefully  
634 revised the manuscript.

635

636 1) While I understand the usage in comparison to previous work, the portion of the  
637 title “Binuclear single-atom irons” is a bit problematic as the binuclear and plural of  
638 iron both seem to contradict the “single-atom” term. This term is of course somewhat  
639 problematic for all “single-atom” sites since local structure can strongly influence  
640 key binding sites but even more so here where 2 distinct atoms are serving as the  
641 localized active site. A similar issue occurs at the end of the discussion on page 12  
642 where the term “monatomic binuclear active sites” is used.

643 Response: Thank you for your helpful comments. We agree with the reviewer’s  
644 suggestion. To avoid the confusion, we revised the title into *Adjacent single-atom*  
645 *irons boosting molecular oxygen activation on MnO<sub>2</sub>* and also corrected the relevant  
646 term thoroughly in the paper.

647

648 2) Oxygen activation is of course key to a wide variety of (electro)chemical reactions.  
649 A sentence on some of the most technologically important applications and some  
650 additional discussion on the importance of CO → CO<sub>2</sub> in particular would help  
651 highlight the importance of this work.

652 Response: Thank you for your suggestion. In the introduction, we added the  
653 discussion on the importance of CO → CO<sub>2</sub> to highlight the significance of this work  
654 as follows. *“Molecular oxygen activation, a continuous process of adsorption and*

655 *dissociation of O<sub>2</sub> on the catalyst surface (Figure S1), is a key step in catalytic*  
656 *reactions [Chem. Rev., 118, 2816-2862 (2018)], including the synthesis of organic*  
657 *compounds, catalytic combustion of volatile organic compounds (VOCs), oxygen*  
658 *reduction reaction (ORR) in fuel cells and so on [J. Am. Chem. Soc. 134,*  
659 *13018-13026 (2012); ACS Catal. 11, 6614-6625 (2021); Nat. Catal. 4, 463-468*  
660 *(2021)].”*

661 *“High-efficiency CO oxidation is of great significance in automotive exhaust*  
662 *purification and the anti-toxicity improvement of proton exchange membrane fuel*  
663 *cells [Science 358, 1419–1423 (2017); ACS Catal., 10, 6532–6545 (2020)].”*

664 *During the revision, more discussion about oxygen activation was added on page 2*  
665 *and 5 in the revised manuscript and the related Refs. 1-4, 16 and 17 were cited.*

666

667 *3) On a technical level, the denticity/binding motif of the bound O<sub>2</sub> as brought up on*  
668 *page 7 and Figure S10 could be strengthened somewhat. In particular, it seems odd to*  
669 *not have considered and reported on the energetics of the O<sub>2</sub> with 1 O bonded to each*  
670 *of the Fe atoms, even if it is indeed higher energy than the O<sub>2</sub> bridging the 2 Fe with a*  
671 *single O. Also, based on equation 5, it appears that binding does not include*  
672 *vibrational contributions to the free energy including zero-point energies. Given how*  
673 *close some of the competing binding sites are for the O<sub>2</sub>, these effects may well shift*  
674 *binding energetics, especially for different binding motifs which should be addressed.*

675 *Response: We appreciate the insightful comments from the reviewer. During the*  
676 *revision, we calculated the situation for each oxygen atom from O<sub>2</sub> attached to Fe site*  
677 *(side-on configuration) (Figure R5b), and found that the adsorption energy (-1.47 eV)*  
678 *of O<sub>2</sub> in side-on configuration was significantly lower than that (-2.00 eV) of the*  
679 *end-on adsorption configuration (Fe(O=O)Fe) (Figure R5a). Thereby, the adsorption*  
680 *of O<sub>2</sub> on Fe sites preferred to the end-on mode. Meanwhile, we also calculated the*  
681 *Bader charge and the differential charge density of side-on configuration (Figure R19),*  
682 *and found that two oxygen atoms got the same number of electrons, and the electron*  
683 *density was evenly distributed among the adsorbed oxygen molecule. Therefore, the*  
684 *dipole moment of oxygen molecules did not change during the vibration process,*

685 inconsistent with the results of the in-situ DRIFTS. As a result, the adsorption  
 686 configuration of oxygen on Fe sites in side-on mode was further excluded.

687 Zero-point energy correction (Table R2) was carried out for each adsorption  
 688 configuration, and the corresponding adsorption energies was recalculated (Figure  
 689 R5).

690 *During the revision, Figure R19 and Table R2 was added as the new Supplementary*  
 691 *Figure S17 and Table S8, respectively.*

692

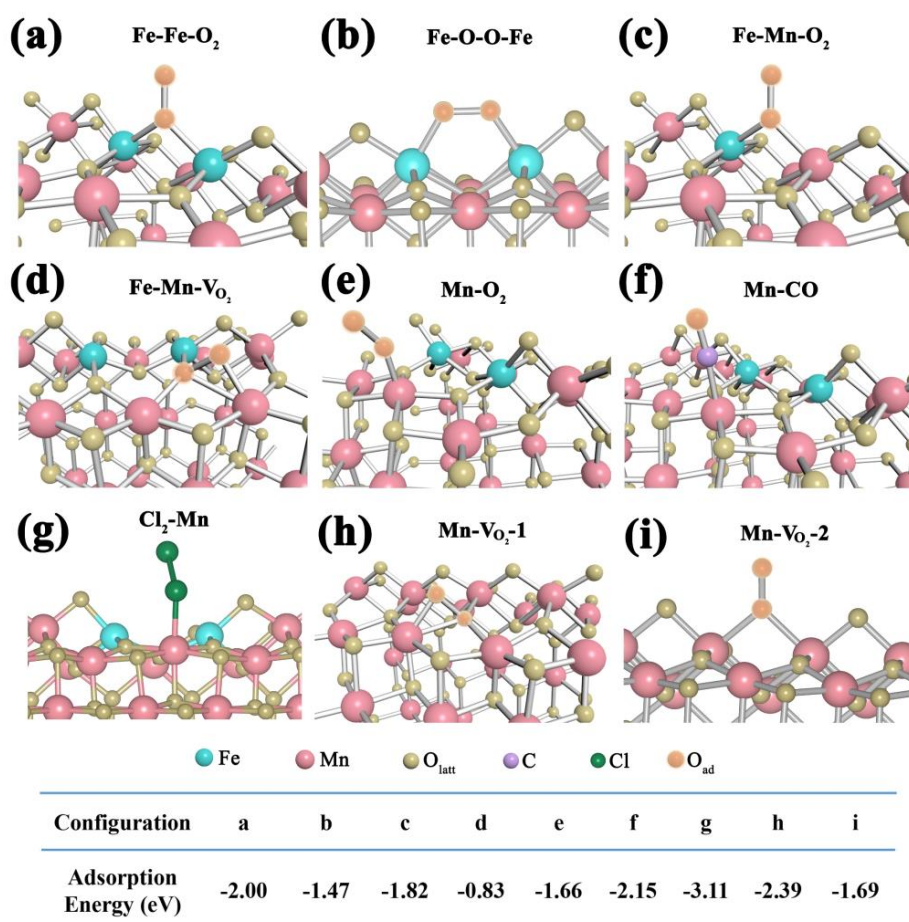

693

694 Figure R5. The stable configurations of (a-e) O<sub>2</sub>, (f) CO and (g) Cl<sub>2</sub> adsorbed at the  
 695 different sites of Fe/MnO<sub>2</sub> surface, and O<sub>2</sub> adsorbed in (h) the oxygen vacancy or (i)  
 696 bi-manganese sites of MnO<sub>2</sub>. The corresponding adsorption energy with zero-point  
 697 energy correction is listed in the table of the picture.

698

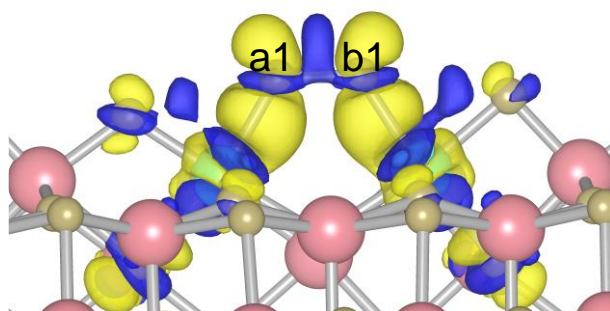

| Oxygen atom  | a1    | b1    |
|--------------|-------|-------|
| Bader Charge | -0.12 | -0.12 |

699

700 Figure R19. The difference charge density of O<sub>2</sub> adsorbed on Fe/MnO<sub>2</sub>. Different  
 701 oxygen atoms from adsorbed oxygen species were labeled as a1 and b1, and  
 702 corresponding Bader charge was recorded in the bottom of charge density map. The  
 703 charge density of yellow and blue represents the concentrated and scarce electrostatic  
 704 potential scale respectively.

705

706 Table R2. Calculated energy and zero-point energy of the corresponding free and  
 707 adsorbed molecules.

| Configuration         | Energy (eV) | Zero Point Energy (eV) | Corrected Energy (eV) |
|-----------------------|-------------|------------------------|-----------------------|
| Fe-Fe-O <sub>2</sub>  | -545.52     | 0.08                   | -545.44               |
| Fe-O-O-Fe             | -544.97     | 0.06                   | -544.91               |
| Fe-Mn-O <sub>2</sub>  | -545.25     | 0.07                   | -545.18               |
| Fe-Mn-VO <sub>2</sub> | -547.20     | 0.05                   | -547.15               |
| Mn-O <sub>2</sub>     | -545.19     | 0.09                   | -545.10               |
| Mn-CO                 | -551.88     | 0.12                   | -551.76               |
| Mn-VO <sub>2</sub> -1 | -548.80     | 0.05                   | -548.75               |
| Mn-VO <sub>2</sub> -2 | -548.13     | 0.08                   | -548.05               |
| Cl <sub>2</sub> -Mn   | -540.66     | 0.01                   | -540.65               |
| O <sub>2</sub>        | -8.84       | 0.10                   | -8.74                 |
| CO                    | -14.80      | 0.13                   | -14.67                |
| Cl <sub>2</sub>       | -3.58       | 0.03                   | -3.55                 |

708

709

710 **References cited in the Response Letter.**



- 711 1 Montemore, M. M., van Spronsen, M. A., Madix, R. J. & Friend, C. M. O<sub>2</sub>  
712 Activation by Metal Surfaces: Implications for Bonding and Reactivity on  
713 Heterogeneous Catalysts. *Chem. Rev.* **118**, 2816-2862 (2018).
- 714 2 Mukherjee, D., Ellern, A. & Sadow, A. D. Remarkably Robust Monomeric  
715 Alkylperoxyzinc Compounds from Tris(oxazolanyl)boratozinc Alkyls and O<sub>2</sub>. *J.*  
716 *Am. Chem. Soc.* **134**, 13018-13026 (2012).
- 717 3 Ma, Y. et al. Investigation into the Enhanced Catalytic Oxidation of o-Xylene  
718 over MOF-Derived Co<sub>3</sub>O<sub>4</sub> with Different Shapes: The Role of Surface  
719 Twofold-Coordinate Lattice Oxygen (O<sub>2f</sub>). *ACS Catal.* **11**, 6614-6625 (2021).
- 720 4 Li, H. et al. Analysis of the limitations in the oxygen reduction activity of  
721 transition metal oxide surfaces. *Nat. Catal.* **4**, 463-468 (2021).
- 722 5. Nie, L. et al. Activation of surface lattice oxygen in single-atom Pt/CeO<sub>2</sub> for  
723 low-temperature CO oxidation. *Science* **358**, 1419-1423 (2017).
- 724 6. Davó-Quñonero, A. et al. Insights into the Oxygen Vacancy Filling Mechanism  
725 in CuO/CeO<sub>2</sub> Catalysts: A Key Step Toward High Selectivity in Preferential CO  
726 Oxidation. *ACS Catal.* **10**, 6532-6545 (2020).
- 727 7 Liu, J.-X., Su, Y., Filot, I. A. W. & Hensen, E. J. M. A Linear Scaling Relation  
728 for CO Oxidation on CeO<sub>2</sub>-Supported Pd. *J. Am. Chem. Soc.* **140**, 13624 (2018).
- 729 8 Yang, J. et al. Oxygen Vacancy Promoted O<sub>2</sub> Activation over Perovskite Oxide  
730 for Low-Temperature CO Oxidation. *ACS Catal.* **9**, 9751-9763 (2019).
- 731 9 Puigdollers, A. R. & Pacchioni, G. CO Oxidation on Au Nanoparticles Supported  
732 on ZrO<sub>2</sub>: Role of Metal/Oxide Interface and Oxide Reducibility. *ChemCatChem*  
733 **9**, 1119-1127 (2017).
- 734 10. Bae, W. K. et al. Highly Effective Surface Passivation of PbSe Quantum Dots  
735 through Reaction with Molecular Chlorine. *J. Am. Chem. Soc.* **134**, 20160-20168  
736 (2012).
- 737 11. He, C. et al. Recent Advances in the Catalytic Oxidation of Volatile Organic  
738 Compounds: A Review Based on Pollutant Sorts and Sources. *Chem. Rev.* **119**,  
739 4471-4568 (2019).



- 740 12. Dai, Q. et al. HCl-Tolerant  $H_xPO_4/RuO_x-CeO_2$  Catalysts for Extremely Efficient  
741 Catalytic Elimination of Chlorinated VOCs. *Environ. Sci. Technol.* **55**,  
742 4007-4016 (2021).
- 743 13 Nelson, N. C., Nguyen, M.-T., Glezakou, V.-A., Rousseau, R. & Szanyi, J.  
744 Carboxyl intermediate formation via an in situ-generated metastable active site  
745 during water-gas shift catalysis. *Nat. Catal.* **2**, 916-924 (2019).
- 746
- 747

## <b>REVIEWERS' COMMENTS</b>

### Reviewer #1 (Remarks to the Author):

The authors have provided more experimental evidence and calculation results to address my previous concerns, and have revised the manuscript and its SI accordingly. The whole manuscript has been improved drastically. Therefore, I would endorse its acceptance.

### Reviewer #2 (Remarks to the Author):

The authors made very good effort for revising manuscript. The results structural characterizations provided in the revised manuscript and supporting information are satisfactory and I'm convinced by the authors' explanation. My one last suggestion is to include the information regarding specific activity at T50 in addition to the activation energies reported already in the manuscript since the mass of Fe is now clear through this revision thanks to the authors' effort for identifying the amount of Fe atoms on MnO<sub>2</sub>, and discuss it with reported values (see for example, <https://www.nature.com/articles/s41929-019-0282-y> which summarizes the specific activities of single and few atom catalysts). I consider that the specific activity is one of the important figure of merit of catalyst to consider the practical applications.

### Reviewer #3 (Remarks to the Author):

I will defer to the other reviewers on their comments, though they have made some very good points regarding the experimental data and its interpretation. I very much appreciate the authors' work to address the Reviewer 3 comments but I still have some reservations regarding the work as presented though these are fairly minor and should be easily addressed. First, the new term "adjacent single-atom iron" is still somewhat problematic. MnO<sub>2</sub>-hosted Fe dimer seems like a much more appropriate term given that in the pathways presented, both iron atoms play some direct role, making the "single-atom" phrase inappropriate. I don't understand the continued inclusion in this manuscript. It also looks from the figures that the Fe is integrated into the MnO<sub>2</sub> oxide which means these are likely substitutional defects and not adatom like structures. This needs to be made more explicitly clear since "adjacent Fe atoms anchored on MnO<sub>2</sub>" sounds like dimer pairs of adatoms which does not appear to be the structures considered since oxygen atoms are above the Fe (e.g., Figs. R19 and R5).

Also, more detail is required on the zero-point energy correction (e.g., in what limit was it calculated/ methodology used and which atoms were utilized for calculating... likely only the adsorbing molecule based on values but this should be explicitly stated). The treatment of end-on vs. side-on is appropriate, showing relevant DFT values and the additional DRIFTS argument regarding dipole makes some sense, though having a complimentary end-on O<sub>2</sub> plot analogous to R19 would be beneficial for showing there is a dipole shift in such cases, strengthening the dipole argument.

## Response Letter

We thank all three Reviewers for their positive reviews and the constructive suggestions that help to improve the scientific presentation of this manuscript. Point-by-Point responses to address the concerns raised by the Reviewers are shown below:

### **Reviewer #1 (Remarks to the Author):**

*The authors have provided more experimental evidence and calculation results to address my previous concerns, and have revised the manuscript and its SI accordingly. The whole manuscript has been improved drastically. Therefore, I would endorse its acceptance.*

Response: We sincerely thank the Reviewer for the approval of this manuscript.

### **Reviewer #2 (Remarks to the Author):**

*The authors made very good effort for revising manuscript. The results structural characterizations provided in the revised manuscript and supporting information are satisfactory and I'm convinced by the authors' explanation. My one last suggestion is to include the information regarding specific activity at T50 in addition to the activation energies reported already in the manuscript since the mass of Fe is now clear through this revision thanks to the authors' effort for identifying the amount of Fe atoms on MnO<sub>2</sub>, and discuss it with reported values (see for example, <https://www.nature.com/articles/s41929-019-0282-y>, which summarizes the specific activities of single and few atom catalysts). I consider that the specific activity is one of the important figure of merit of catalyst to consider the practical applications.*

Response: Thank you for your nice comment and helpful suggestion. Referring to the remarkable article [*Nat. Catal.*, 2019, 2, 590–602], we calculated the specific activity ( $R_{T50}$ ) of 0.25% Fe/MnO<sub>2</sub> according to the calculation formula (1) and the value was 310 mol<sub>CO</sub> h<sup>-1</sup> mol<sub>Fe</sub><sup>-1</sup> with T50 at 47 °C, higher than those of most platinum group

metal (PGM) catalysts.

Specific activity was calculated by the following equation:

$$R_{T50} = \frac{v_{CO} \times M_{Fe}}{m_{Fe}} \quad (1)$$

Where  $v_{CO}$  represents the molar gas flow rate of CO (mol/h);  $M_{Fe}$  is the relative atomic mass of Fe;  $m_{Fe}$  is the mass of Fe on the basis of ICP results and statistical results from 0.25% Fe/MnO<sub>2</sub> STEM image.

*During the revision, we also cited this relevant literature [Nat. Catal., 2019, 2, 590–602] as Ref. 18 and added the corresponding discussion on page 20 in the revised manuscript as follows. “Simultaneously, we calculated the specific activity ( $R_{T50}$ ) of 0.25% Fe/MnO<sub>2</sub> according to the calculation formula (10) and the value was 310 mol<sub>CO</sub> h<sup>-1</sup> mol<sub>Fe</sub><sup>-1</sup> with T50 at 47 °C, higher than those of most platinum group metal (PGM) catalysts.<sup>[18]”</sup>*

**Reviewer #3 (Remarks to the Author):**

*I will defer to the other reviewers on their comments, though they have made some very good points regarding the experimental data and its interpretation. I very much appreciate the authors’ work to address the Reviewer 3 comments but I still have some reservations regarding the work as presented though these are fairly minor and should be easily addressed. First, the new term “adjacent single-atom iron” is still somewhat problematic. MnO<sub>2</sub>-hosted Fe dimer seems like a much more appropriate term given that in the pathways presented, both iron atoms play some direct role, making the “single-atom” phrase inappropriate. I don’t understand the continued inclusion in this manuscript. It also looks from the figures that the Fe is integrated into the MnO<sub>2</sub> oxide which means these are likely substitutional defects and not adatom like structures. This needs to be made more explicitly clear since “adjacent Fe atoms anchored on MnO<sub>2</sub>” sounds like dimer pairs of adatoms which does not*

appear to be the structures considered since oxygen atoms are above the Fe (e.g., Figs. R19 and R5).

Also, more detail is required on the zero-point energy correction (e.g., in what limit was it calculated/ methodology used and which atoms were utilized for calculating... likely only the adsorbing molecule based on values but this should be explicitly stated). The treatment of end-on vs. side-on is appropriate, showing relevant DFT values and the additional DRIFTS argument regarding dipole makes some sense, though having a complimentary end-on O<sub>2</sub> plot analogous to R19 would be beneficial for showing there is a dipole shift in such cases, strengthening the dipole argument.

Response: We thank the reviewer for the constructive advices and would like to reply to the comments as follows.

(1) In order to avoid the confusion, we added “*also called as MnO<sub>2</sub>-hosted Fe dimer,*” in the abstract to further explain the structure of catalyst developed in this study.

(2) Zero-point energy correction was obtained from vibrational frequencies by applying normal-mode analysis through density functional theory calculations [*J. Am. Chem. Soc.* 2021, 143, 1399-1408]. We fixed the catalyst substrate and only allowed the adsorbing molecule to vibrate.

(3) We added the configuration of oxygen molecule adsorbed on the two adjacent Fe sites with end-on mode, and Bader charge calculation results revealed the two oxygen atoms had different charges (-0.37 and -0.06) (Figure R1a). The different charges constantly changed the dipole moment of O<sub>2</sub> in the vibration process, accounting for the infrared characteristic absorption peak of Fe(O=O)Fe. However, for the side-on configuration (Figure R1b), two oxygen atoms got the same number of electrons, and the electron density was evenly distributed among the adsorbed oxygen molecule. Therefore, the dipole moment of oxygen molecules did not change during the vibration process. As a result, the adsorption configuration of oxygen on Fe sites was determined with end-on mode.

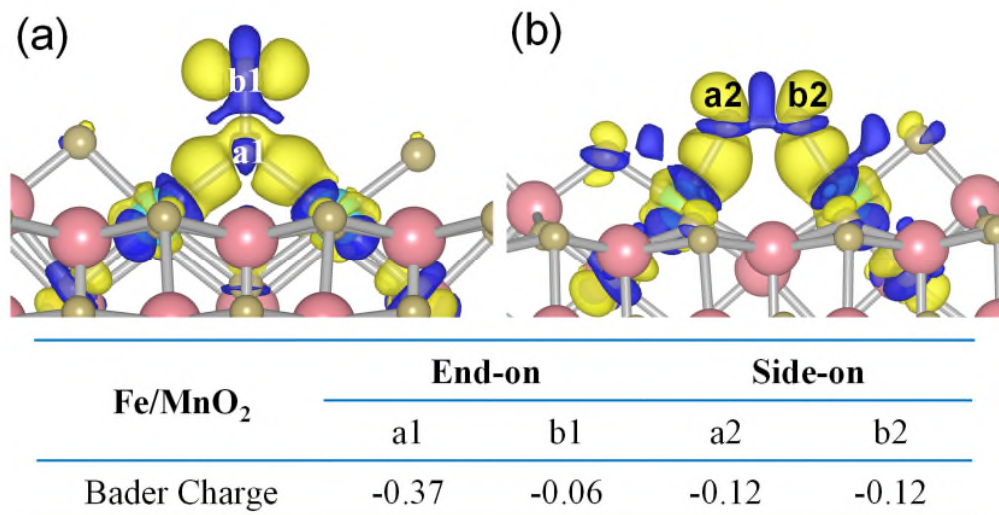

Figure R1. The difference charge density of O<sub>2</sub> adsorbed on Fe/MnO<sub>2</sub> with (a) end-on and (b) side-on mode. Different oxygen atoms from adsorbed oxygen species were labeled as a and b, and corresponding Bader charge was recorded in the bottom of charge density map. The charge density of yellow and blue represents the concentrated and scarce electrostatic potential scale respectively.

*During the revision, Figure R1 was added as the Figure 3d and the Supplementary Figure S18. The discussion about zero-point energy correction was added on page 6 in the revised manuscript as follows. “Zero-point energy correction was obtained from vibrational frequencies by applying normal-mode analysis through density functional theory calculations.<sup>[43]</sup> We fixed the catalyst substrate and only allowed the adsorbing molecule to vibrate.”*

#### References cited in the Response Letter.

- [1] Beniya, A. & Higashi, S. Towards dense single-atom catalysts for future automotive applications. *Nat. Catal.* **2**, 590-602 (2019).
- [2] Kim, J. *et al.* Tailoring binding abilities by incorporating oxophilic transition metals on 3D nanostructured Ni arrays for accelerated alkaline hydrogen evolution reaction. *J. Am. Chem. Soc.* **143**, 1399-1408 (2021).
